1  
2  
3  
4  
5  
6  
7  
8  
9  
10  
11  
12  
13  
14  
15  
16  
17  
18  
19  
20  
21  
22  
23  
24  
25  
26  
27  
28

## **Cerebral organoid model reveals excessive proliferation of human caudal late interneuron progenitors in Tuberous Sclerosis Complex**

Oliver L. Eichmüller<sup>1</sup>, Nina S. Corsini<sup>1\*</sup>, Ábel Vértesy<sup>1</sup>, Theresa Scholl<sup>2</sup>, Victoria-Elisabeth Gruber<sup>2</sup>, Angela M. Peer<sup>1</sup>, Julia Chu<sup>3</sup>, Maria Novatchkova<sup>1</sup>, Mercedes F. Paredes<sup>3</sup>, Martha Feucht<sup>2</sup> and Jürgen A. Knoblich<sup>1\*</sup>

1 IMBA – Institute of Molecular Biotechnology of the Austrian Academy of Science, Vienna Biocenter (VBC), Vienna, Austria

2 Medical University of Vienna, Department of Pediatric and Adolescent Medicine, Vienna, Austria

3 Department of Neurology, University of California, San Francisco, USA.

\* Corresponding authors

[nina.corsini@imba.oeaw.ac.at](mailto:nina.corsini@imba.oeaw.ac.at); [juergen.knoblich@imba.oeaw.ac.at](mailto:juergen.knoblich@imba.oeaw.ac.at)

## 29 **Summary**

30 Although the intricate and prolonged development of the human brain critically  
31 distinguishes it from other mammals<sup>1</sup>, our current understanding of  
32 neurodevelopmental diseases is largely based on work using animal models. Recent  
33 studies revealed that neural progenitors in the human brain are profoundly different  
34 from those found in rodent animal models<sup>2-5</sup>. Moreover, post-mortem studies  
35 revealed extensive migration of interneurons into the late-gestational and post-natal  
36 human prefrontal cortex that does not occur in rodents<sup>6</sup>. Here, we use cerebral  
37 organoids to show that overproduction of mid-gestational human interneurons  
38 causes Tuberous Sclerosis Complex (TSC), a severe neuro-developmental disorder  
39 associated with mutations in *TSC1* and *TSC2*. We identify a previously  
40 uncharacterized population of caudal late interneuron progenitors, the CLIP-cells. In  
41 organoids derived from patients carrying heterozygous *TSC2* mutations,  
42 dysregulation of mTOR signaling leads to CLIP-cell over-proliferation and formation  
43 of cortical tubers and subependymal tumors. Surprisingly, second-hit events  
44 resulting from copy-neutral loss-of-heterozygosity (cnLOH) are not causative for but  
45 occur during the progression of tumor lesions. Instead, EGFR signaling is required  
46 for tumor proliferation, opening up a promising approach to treat TSC lesions. Our  
47 study demonstrates that the analysis of developmental disorders in organoid models  
48 can lead to fundamental insights into human brain development and neuropsychiatric  
49 disorders.

50 Tuberos sclerosis complex (TSC) is a rare autosomal dominant disorder  
51 characterized by pathological malformations in multiple organs<sup>7</sup>. Among those, brain  
52 defects leading to severe neuropsychiatric symptoms like autism spectrum disorder  
53 (ASD), intractable seizures and intellectual disability (ID) are most debilitating and  
54 seen in the majority of patients<sup>8</sup>. Most patients have cortical tubers<sup>9</sup>, focal dysplastic  
55 regions in the cortex that are diagnosed by MRI and consist of dysmorphic neurons  
56 and giant cells. In addition, 80% of the patients display subependymal nodules  
57 (SEN) that form along the lateral ventricle and can develop into subependymal giant  
58 cell astrocytomas (SEGAs) in 10-15% of the patients<sup>7,10</sup>. It was thought that TSC  
59 pathogenesis is initiated by constitutive mTOR activity resulting from inactivation of  
60 the second allele<sup>11</sup> along the lines of the classic Knudson two-hit hypothesis of  
61 tumorigenesis<sup>12</sup>. This is supported by existing mouse models and a spheroid model  
62 for TSC, as characteristic brain alterations are observed exclusively in *Tsc1* or *Tsc2*  
63 homozygous mutant mice and spheroids<sup>13-18</sup>. Genetic analysis in patients, however,  
64 revealed that loss of the second allele is frequent in SEN/SEGA, but rare in cortical  
65 tubers<sup>19-22</sup>, conflicting with the two-hit hypothesis. In addition, the cellular origins of  
66 cortical tubers and SEN/SEGAs remain unclear. Interestingly, recent work using  
67 human primary tissues suggested a common cell-of-origin for both lesions based on  
68 shared transcriptomic alterations<sup>21</sup>. In order to study the cell types and mechanisms  
69 leading to the generation of tumors and tubers we generated human cerebral  
70 organoids<sup>23</sup> from patient-derived induced pluripotent stem cells (iPSCs) and  
71 compared our results to human primary material.

## 72 **Human cerebral organoids recapitulate TSC histopathology**

73 To model the brain pathology of TSC, we derived human iPSCs from two patients  
74 with known *TSC2* mutations (Ext. Data Fig. 1). All selected patients have drug-  
75 resistant epilepsy and show cortical tubers and subependymal tumors (Ext. Data Fig.  
76 1A-C). The first patient is germline mosaic, which allowed us to derive both *TSC2*<sup>+/-</sup>  
77 and isogenic *TSC2*<sup>+/+</sup> lines (Ext. Data Fig. 1D). For the second patient, isogenic  
78 controls were generated by scarless Crispr-based genome editing (Ext. Data Fig.  
79 1E). To study proliferative phenotypes, organoids were cultured in a high-nutrient (H-  
80 ) medium that promotes proliferation analogous to germinal areas that give rise to  
81 subependymal tumors in the brain (Fig. 1B). In order to mimic cortical tuber  
82 formation, we transitioned organoids to a low-nutrient (L-) medium that was designed  
83 by adapting a published formulation<sup>24</sup> to 3D culture (Fig. 1B, see Materials and  
84 Methods for details).

85 Consistent with previous results<sup>18</sup>, we found no obvious differences between  
86 genotypes within the first 90 days of culture corresponding to early phases of  
87 neurodevelopment (Ext. Data Fig. 2). 110 days after embryoid body (EB) formation,  
88 however, nodular aggregates of cells expressing the proliferative marker Ki67 and  
89 the mTOR activation marker phospho-S6 (pS6) formed in *TSC2*<sup>+/-</sup> organoids cultured  
90 in H-medium (Fig. 1D, G, H and Ext. Data Fig. 2). These structures morphologically  
91 resembled SENs or SEGAs that grow along the lateral ventricle in TSC patient  
92 brains<sup>25-27</sup> (Fig. 1C). SEN/SEGAs are neuroglial tumors that have been proposed  
93 to originate from an unknown population of neural stem cells (NSCs)<sup>28</sup>. To probe for  
94 an NSC origin of SEN-like tumors in organoids we stained for the classical NSC  
95 markers Nestin and Ascl1. Both proteins were expressed in tumors (Ext. Data Fig.  
96 7A) indicating a neural progenitor identity of SEN/SEGAs.



97 To determine whether we can also recapitulate pathological cell types of cortical  
98 tubers, we analyzed organoids cultured for 120 to 150 days in L-medium. In  
99 organoids derived from *TSC2*<sup>+/-</sup> cells, we found neurons with an enlarged soma and  
100 thickened processes, similar to dysmorphic neurons in cortical tubers (Fig. 1E, I).  
101 These neurons stained for the neural marker MAP2 and were not present in control  
102 organoids. After prolonged maturation in L-medium for about 230-days, clusters of  
103 enlarged pS6 positive cells appeared (Fig. 1F and Ext. Data Fig. 3). The morphology  
104 as well as the expression of markers like GFAP and Vimentin was reminiscent of  
105 giant cells (GCs), the second main pathological cell type of cortical tubers<sup>7,9</sup>, which  
106 had characteristically low proliferation rates (Fig. 1F). Thus, organoids derived from  
107 *TSC2*<sup>+/-</sup> hiPSCs recapitulate the major histopathological features found in the brain  
108 of TSC patients.

109

### 110 **Single cell analysis of *TSC2*<sup>+/-</sup> organoids reveals a caudal progenitor population**

111 Since our organoid model recapitulated major disease features, we sought to identify  
112 the elusive common cell-of-origin for both cortical tubers and subependymal  
113 tumors<sup>21</sup>. We performed single cell RNA sequencing (scRNA-Seq) of 110 days-old  
114 organoids derived from *TSC2*<sup>+/-</sup> and isogenic Ctrl (*TSC2*<sup>+/+</sup>) cells from Patient 1  
115 cultured in L-medium. Unsupervised clustering overlaid on UMAP projection  
116 distinguished major cell types previously described in cerebral organoids<sup>2,29</sup> (Fig. 2A  
117 and B, Ext. Data Fig. 4A).

118 Next, we identified cell types strongly expanded in *TSC2*<sup>+/-</sup> organoids compared to  
119 Ctrl. We found that interneurons (cluster 4 and 14) and dividing cells of ventral origin  
120 (cluster 8) showed vastly increased contribution from *TSC2*<sup>+/-</sup> organoids. Among  
121 progenitors, lateral ganglionic eminence (LGE)-derived radial glia (RGs) (cluster 12)

122 were unchanged (Fig. 2A and C, Ext. Data Fig. 4A), but a previously undescribed  
123 cluster of progenitor cells was strongly enriched in *TSC2*<sup>+/-</sup> cells (cluster 9, Fig. 2C,  
124 Ext. Data Fig. 4B). This cluster was characterized by the expression of genes  
125 associated with the caudal ganglionic eminence (CGE) like *COUP-TFII*, *PROX1* and  
126 the EGF receptor (*EGFR*, Fig. 2C). These cells also expressed a unique set of  
127 genes (Ext. Data Fig. 4B) such as the Endothelin Receptor B (*EDNRB*, Fig. 2C).  
128 To analyze whether this neural progenitor is also found *in vivo* we compared our  
129 data to a published scRNA-Seq dataset of the developing human fetal brain<sup>30</sup>. After  
130 integrating these data with our dataset, unsupervised clustering identified the same  
131 cluster in fetal brains (cluster 18 Ext. Data Fig. 4D, E). Correspondingly, we identified  
132 EGFR positive cells in immunostainings of the CGE at 21 gestational weeks (GW)  
133 (Ext. Data Fig. 5).

134 An interesting feature of both cortical tubers and tumors is the late developmental  
135 onset, both forming around mid-gestation<sup>25</sup>. As this is recapitulated in our organoid  
136 model, we analyzed whether the newly identified neural progenitor cells (NPCs) in  
137 organoids (cluster 9, Fig. 2A) were corresponding to fetal progenitors of a particular  
138 age. Therefore, we compared the transcriptome of fetal and organoid NPCs. We  
139 found the highest correlation of the newly identified caudal NPCs to RGs originating  
140 from late mid-gestational ages (Fig. 2D). Furthermore, co-clustering revealed that  
141 most fetal cells within the corresponding cluster (cluster 18, Ext. Data Fig. 4E)  
142 originated from gestational week (GW) 22 (Ext. Data Fig. 4F) indicating the late  
143 signature of this cell type. Based on these characteristics, the newly identified cells  
144 were named caudal late interneuron progenitors or CLIP-cells.

145

146 **CLIP-cells are activated in *TSC2*<sup>+/-</sup>**

147 mTOR signaling regulates quiescence and activation in a variety of stem cell  
148 systems<sup>31-33</sup>. In order to understand whether altered mTOR signaling could affect the  
149 balance between quiescence and activation in *TSC2*<sup>+/-</sup> CLIP-cells, we used multiple  
150 scRNA-Seq studies to derive a gene list that discriminates between activated and  
151 quiescent states (Ext. Data Table 2)<sup>34-37</sup>. We performed hierarchical clustering of all  
152 identified CLIP-cells and the expression of genes on this list (Fig. 2E and Ext. Data  
153 Fig. 5A, B). This defined four sub-clusters of quiescent-, primed-, activated- and  
154 transient amplifying cells (TAC) / neuroblasts (Fig. 2E, Ext. Data Fig. 5A, B). In  
155 *TSC2*<sup>+/-</sup> organoids, activated sub-populations were increased while quiescent cells  
156 were reduced (Fig. 2E, Ext. Data Fig. 5A, B and C). Our analysis identified EGFR  
157 expression as a marker for activated CLIP-cells. Immunostainings revealed more  
158 EGFR positive cells in *TSC2*<sup>+/-</sup> organoids, confirming the scRNA Seq results (Ext.  
159 Data Fig. 5D). This suggests a role for the mTOR pathway in controlling CLIP cell  
160 activation that could explain why *TSC2*<sup>+/-</sup> organoids show an increase in CLIP cells  
161 and in CGE-derived interneurons (Fig. 2B).

162

### 163 **TSC tumors express CLIP cell markers**

164 In order to investigate whether CLIP-cells are the neural progenitors causing  
165 neuroglial TSC tumors, we stained *TSC2*<sup>+/-</sup> organoids for the CLIP-cell markers  
166 identified in our scRNA-seq dataset (Ext. Data Fig. 4B). Among these are the CGE-  
167 associated markers COUP-TFII, PROX1, SCGN and EGFR, as well as the unique  
168 markers EDNRB and prostaglandin D synthase (PTGDS).

169 To test for a CGE-origin we investigated expression of EGFR and COUP-TFII in  
170 tumors. EGFR (Fig. 3A) was co-expressed with COUP-TFII (Ext. Data Fig. 7C and  
171 D) in SEN-like tumors within *TSC2*<sup>+/-</sup> organoids. Consistent with previous

172 observations<sup>38</sup>, we also detected EGFR expression in surgically removed SEGAs  
173 (Fig. 3A). To assess unique CLIP-cell markers, we stained organoids for EDNRB  
174 and PTGDS, in addition to the CGE marker PROX1. EDNRB (Fig. 3B) was both co-  
175 expressed with PROX1 (Ext. Data Fig. 8A) in organoid tumors and detected in  
176 SEGAs resected from patient brains (Fig. 3B). Similarly, PTGDS was expressed  
177 together with COUP-TFII and PROX1 in *TSC2*<sup>+/-</sup>-derived organoid tumors (Ext. Data  
178 Fig. 9B) and in CLIP-cells in Ctrl organoids of the same age (Ext. Data Fig. 9A).  
179 Finally, we tested expression of SCGN, a marker for the CGE derived interneurons.  
180 SCGN was expressed in tumors in organoids (Ext. Data Fig. 10D) and in resected  
181 SEGA samples (Ext. Data Fig. 10E), indicating that CLIP-cells in tumors can still  
182 produce interneurons.  
183 Taken together these data suggest that CLIP-cells might be the developmental cell-  
184 of-origin of TSC tumors and constitute the neuroglial identity of SENs and SEGAs  
185 together with their interneuron progeny.

186

187

### 188 **Giant cells in cortical tubers express CLIP-cell markers**

189 To address whether CLIP-cells also generate the giant cells found in cortical tubers,  
190 we tested the same markers in tuber-like structures in organoids and in patient  
191 derived brain tissue. In 230 days-old *TSC2*<sup>+/-</sup>-derived organoids cultured in L-  
192 medium almost all pS6-positive giant cells stain positive for EGFR (Fig. 3C).  
193 Correspondingly, EGFR was also expressed in giant cells within postnatally resected  
194 tubers (Fig. 3D). To address expression of CLIP-cell specific markers in giant cells,  
195 we stained for EDNRB and PTGDS as well as the CGE-associated markers PROX1  
196 and COUP-TFII. We found co-expression of EDNRB and PROX1 (Fig. 3E) in giant

197 cells in organoids and high expression of EDNRB in giant cells in fetal tubers (Fig.  
198 3F) as well as in postnatally resected tubers (Ext. Data Fig. 8E). Likewise, we  
199 detected PTGDS together with PROX1 and COUP-TFII (Ext. Data Fig. 9C) in giant  
200 cells in *TSC2*<sup>+/-</sup>-derived organoids. Thus, giant cells in organoids and tubers express  
201 CLIP-cell specific proteins, suggesting that CLIP-cells also give rise to giant cells  
202 characteristic of cortical tubers.

203

#### 204 **Dysmorphic neurons found in cortical tubers are CGE-derived interneurons**

205 To investigate whether dysmorphic neurons found in cortical tubers are related to  
206 CLIP-cells, we stained for the CGE markers SCGN and COUP-TFII. Most  
207 dysmorphic neurons (identified by MAP2 staining, see Fig. 1E) expressed COUP-  
208 TFII and/or SCGN (Pat.1: 84%, Pat.2 92%; Fig. 3G and H, Ext. Data Fig. 10A).

209 Accordingly, we found expression of SCGN in fetal cortical tubers (Ext. Data Fig.  
210 10C) and postnatally resected tubers (Fig. 3I and Ext. Data Fig. 10B). SCGN and  
211 COUP-TFII positive neurons in tubers differed strikingly from age-matched healthy  
212 control cases, showing thickened dysmorphic processes and enlarged soma (Fig. 3J  
213 and Ext. Data Fig. 10B). These data demonstrate that dysmorphic neurons in  
214 organoids and in TSC patients are CGE-derived interneurons, suggesting that they  
215 originate from CLIP-cells.

216 Taken together, we propose that TSC arises from cell-type specific dysregulation of  
217 neurogenesis in the CGE and that CLIP-cells are the common cell-of-origin of both  
218 the pathological cell types found in tumors and those seen in cortical tubers.

219

#### 220 **Bi-allelic *TSC2* inactivation is dispensable for formation of TSC lesions**

221 As pathological cell types form reproducibly in *TSC2*<sup>+/-</sup> organoids, it is unlikely that  
222 their generation requires loss of the second *TSC2* allele. Bi-allelic inactivation almost  
223 exclusively occurs by copy-neutral loss-of-heterozygosity (cnLOH), and it has been  
224 proposed to cause SEN/SEGAs in TSC patient brains<sup>21,22</sup>. Cortical tuber lesions, in  
225 contrast, only very rarely harbor second-hit events<sup>19-21,39</sup>. To assess the role of  
226 second-hit mutations in the TSC organoid model, we first investigated regions with  
227 giant cells resembling cortical tubers. In 230 days-old *TSC2*<sup>+/-</sup> organoids, *TSC2*  
228 protein was detected in over 98% of the giant cells using an antibody recognizing  
229 only the wild type *TSC2* variant (Patient 1 98.4%, Patient 2 98.7%; Ext. Data Fig.  
230 11A-C). Similarly, and consistent with previous data<sup>40,41</sup>, *TSC2* protein was  
231 expressed in cortical tubers resected from TSC patients (Ext. Data Fig. 11D). This  
232 suggests that second-hit events are not a prerequisite for tuber formation.

233 To determine whether bi-allelic inactivation is also dispensable for the initiation of  
234 tumor lesions, we directly tested the mutational status of 135 to 160-day old *TSC2*<sup>+/-</sup>-  
235 derived organoids. For this, we enriched activated CLIP-cells from both Ctrl and  
236 tumor containing mutant organoids (Fig. 4A) by Fluorescent activated cell sorting  
237 (FACS) for EGFR expression. Both total cell number, as well as absolute and  
238 relative abundance of EGFR-positive cells were increased in *TSC2*<sup>+/-</sup>-derived  
239 organoids (Ext. Data Fig 12). DNA sequencing across the genomic region carrying  
240 the *TSC2* mutation showed that the EGFR-positive cells in organoids derived from  
241 *TSC2*<sup>+/-</sup> cells remained heterozygous in the majority (7/11) of cases (Fig. 4B and C  
242 and Ext. Data Fig. 13A). Only in one of the tumors, we identified a complete cnLOH  
243 while three tumors showed a partial cnLOH (Fig. 4C). To further analyze  
244 recombination events in homozygous TSC tumors, we performed whole genome  
245 sequencing (WGS) on two tumor samples with cnLOH. WGS confirmed cnLOH and

246 revealed that large regions of chromosome 16 around the *TSC2* locus had become  
247 homozygous by recombination (Fig. 4D and E and Ext. Data Fig.12B). No other  
248 mutations were observed in the cnLOH and the general mutation frequency was low,  
249 as previously reported in TSC tumors<sup>21</sup>. Notably, tumors that had become  
250 homozygous have more EGFR-positive cells (Ext. Data Fig 13D), indicating they are  
251 larger. To further analyze, if cnLOH indeed occurred preferentially in larger tumors,  
252 we performed Laser-Capture-Microdissection (LCM) of small and enlarged tumors.  
253 While small tumors remained heterozygous, large tumors exhibited cnLOH events  
254 (Ext. Data Fig. 13F). These data suggest that a second-hit at the *TSC2* locus is not  
255 required for tumor initiation but occurs at later stages of tumor progression.

256

### 257 **Activated CLIP-cells are uniquely susceptible to a heterozygous *TSC2* state**

258 As bi-allelic *TSC2* inactivation was dispensable for both tuber and tumor formation,  
259 we asked why CLIP-cells are particularly sensitive to heterozygous TSC states. We  
260 hypothesized that low endogenous TSC complex levels make CLIP-cells uniquely  
261 susceptible to any further reduction of TSC1 or TSC2. We therefore measured TSC1  
262 and TSC2 protein levels by targeted parallel reaction monitoring (PRM) in previously  
263 genotyped samples of FACS sorted EGFR-positive and -negative cells (Fig. 4 F, G  
264 and Ext. Data Fig. 14). Both in Ctrl and *TSC2*<sup>+/-</sup>-derived organoids, TSC1 and TSC2  
265 levels were lower in EGFR positive samples than in EGFR-negative samples (Fig.  
266 4F). However, while in EGFR-negative cells, TSC1 levels were reduced in *TSC2*<sup>+/-</sup>-  
267 derived organoids compared to Ctrl (Ext. Data Fig. 14C), in the EGFR-positive  
268 population TSC1 levels were similar between Ctrl and *TSC2* mutants (Fig. 4G).  
269 TSC2, in contrast, was significantly more downregulated in EGFR-positive cells in  
270 the *TSC2* mutant compared to the Ctrl population (Fig. 4G). Thus, while in Ctrl

271 organoids both components of the TSC complex were equally reduced in activated  
272 CLIP-cells, loss of one functional *TSC2* allele lead to disproportional reduction of  
273 *TSC2* in EGFR-positive cells. To confirm whether reduction of *TSC2* protein is  
274 specifically found within tumors, we stained for *TSC2*. We found a focal reduction of  
275 *TSC2* in SEN-like tumors, while surrounding regions show *TSC2* expression (Ext.  
276 Data Fig. 11E). These results demonstrate, that CLIP-cells have particularly low  
277 levels of TSC proteins making them uniquely sensitive to mutations in TSC genes.

278

### 279 **TSC tumors depend on EGFR signaling**

280 Both CLIP-cells and the resulting tumors express EGFR. To address the functional  
281 implications of the EGFR pathway for CLIP-cell proliferation and tumor progression,  
282 we developed a drug-testing assay in our organoid model. Current pharmacological  
283 treatment of SEN/SEGAs in TSC is based on the mTOR Complex 1 inhibitor  
284 Everolimus<sup>42-47</sup>. Reports of variable responses and tumor re-growth after  
285 discontinuation necessitate life-long treatment and require alternative therapeutic  
286 strategies. We hypothesized that targeting activated CLIP-cells in TSC tumors  
287 through the EGFR pathway might reduce tumor burden and/or size. 110 days-old  
288 organoids grown in H-medium were treated over the course of 30 days with the  
289 mTOR inhibitor Everolimus, the EGFR receptor tyrosine kinase inhibitor (RTKI)  
290 Afatinib, or the same concentration of DMSO as a control (Ext. Data Fig 15A).  
291 Reductions in tumor burden or size were determined by measuring areas co-  
292 expressing pS6 and EGFR. Everolimus treatment almost completely abolished tumor  
293 appearance in 140 days-old organoids (Fig. 5A, B). After Afatinib treatment, both  
294 tumor load and mean tumor size were significantly reduced when compared to  
295 untreated organoids (Fig. 5A and B, Ext. Data Fig. 15B). These data strongly support



296 a role of EGFR signaling in TSC tumor biology and suggest that targeting the EGFR  
297 pathway could be used as an alternative treatment for TSC brain lesions.

298

299

## 300 **Discussion**

301 While numerous studies in mouse models and a recent spheroid model have defined  
302 loss-of-heterozygosity as a requirement for TSC-like phenotypes<sup>13-18</sup>, our data  
303 suggest that bi-allelic inactivation is dispensable for disease initiation. Instead,  
304 cnLOH events occur during tumor progression and thus are secondary in tumor  
305 pathogenesis. Our observations are in line with reports in patients that identify bi-  
306 allelic inactivation in subependymal tumors but not cortical tubers in the brain<sup>19-  
307 22,39,48</sup>.

308 TSC phenotypes can first be detected around late mid-gestation<sup>25</sup>. In agreement with  
309 this, we identify CLIP-cells, a late progenitor cell that emerges only after the early  
310 phases of neurogenesis have been completed as the cell-of-origin for TSC. CLIP  
311 cells show unique susceptibility towards changes in mTOR signaling that cause TSC  
312 brain pathology. The identification of CLIP-cells as the common cell-of-origin for TSC  
313 brain lesions is the first demonstration of a single founder population giving rise to  
314 two genetically and morphologically distinct phenotypes during brain development.  
315 Thus, our findings explain both the transcriptional commonalities<sup>21</sup> and the  
316 differences in mutational status between TSC lesions, resolving two long-standing  
317 questions in the TSC field.

318 Our work demonstrates that studying the mechanisms of neurodevelopmental  
319 diseases like tuberous sclerosis complex can give insights into human-specific  
320 processes in brain development. The specific expression profile of CLIP-cells namely

321 a caudal and mid-gestational signature has not been described in the human brain  
322 before. However, some of the identified genes, like EDNRB, have been found in  
323 adult neural stem cells responsible for postnatal neurogenesis in other mammals like  
324 the mouse<sup>35</sup>. In mice, however, these cells are only permissive for TSC phenotypes  
325 in a *Tsc1*<sup>null</sup> state<sup>14</sup>. Additionally, SCGN interneurons as produced by CLIP-cells do  
326 not exist in the mouse<sup>49</sup>. Thus, our data raise the exciting possibility, that the  
327 population uniquely susceptible to mutations in the TSC-mTOR pathway only exists  
328 in the human brain. This not only explains why heterozygous *Tsc1/Tsc2* mouse  
329 models do not develop TSC phenotypes, but also shows the requirement for human  
330 models in order to study neurodevelopmental disease.

331 The CGE has previously been described as a source of human specific changes in  
332 neurodevelopment: Firstly, CGE-derived interneurons contribute to the human brain  
333 in much higher percentages compared to rodents<sup>50,51</sup>. Secondly, late-migrating  
334 SCGN interneurons from the CGE have been observed in humans, but not in mice<sup>49</sup>.  
335 Thirdly, a stream of interneurons also containing CGE-derived interneurons,  
336 continues to migrate into the human brain even after birth<sup>6</sup>. However, the relevance  
337 of this population for human neurodevelopment and disease has remained elusive.  
338 We identify expression of CGE markers in dysmorphic neurons in *TSC2*<sup>+/-</sup>-derived  
339 organoids and TSC patients. Together with our characterization of CLIP-cells  
340 emerging around mid-gestation, this suggests that CLIP-cells could be the progenitor  
341 population giving rise to human specific late-migrating interneurons derived from the  
342 CGE.

343 The finding that CLIP-cells and their interneuron progeny are relevant for disease  
344 can help to understand the TSC associated specific neuropsychiatric symptoms. The  
345 range of neuropsychiatric impairments in TSC patients consolidated as tuberous

346 sclerosis-associated neuropsychiatric disorders, or TAND comprises a variety of  
347 complex conditions involved in higher brain functions like autism or attentional  
348 deficits and other specific neuropsychological defects<sup>52</sup>. It will be interesting to  
349 further investigate the role of interneurons derived from CLIP-cells in the alteration of  
350 these human specific traits. Our work highlights the importance of studying late  
351 stages of the prolonged and complex human neurogenesis in order to better  
352 understand human neurodevelopmental disorders.

353

354

355

356

357 Data Availability Statement:

358 All sequencing data is submitted to the European genome-phenome archive (EGA)  
359 and will be made available under restricted access before publication.

360

361 Code Availability Statement:

362 All custom code used to for data analysis will be made available on GitHub at

363 <https://github.com/vertesy/TSC2-CLIP>.

364

## References

365  
366  
367  
368  
369  
370  
371  
372  
373  
374  
375  
376  
377  
378  
379  
380  
381  
382  
383  
384  
385  
386  
387  
388  
389  
390  
391  
392  
393  
394  
395  
396  
397  
398  
399  
400  
401  
402  
403  
404  
405  
406  
407  
408  
409  
410  
411  
412  
413  
414

- 1 Lui, J. H., Hansen, D. V. & Kriegstein, A. R. Development and evolution of the human neocortex. *Cell* **146**, 18-36, doi:10.1016/j.cell.2011.06.030 (2011).
- 2 Pollen, A. A. *et al.* Establishing Cerebral Organoids as Models of Human-Specific Brain Evolution. *Cell* **176**, 743-756 e717, doi:10.1016/j.cell.2019.01.017 (2019).
- 3 Nowakowski, T. J. *et al.* Spatiotemporal gene expression trajectories reveal developmental hierarchies of the human cortex. *Science* **358**, 1318-1323, doi:10.1126/science.aap8809 (2017).
- 4 Hansen, D. V., Lui, J. H., Parker, P. R. & Kriegstein, A. R. Neurogenic radial glia in the outer subventricular zone of human neocortex. *Nature* **464**, 554-561, doi:10.1038/nature08845 (2010).
- 5 Fietz, S. A. *et al.* OSVZ progenitors of human and ferret neocortex are epithelial-like and expand by integrin signaling. *Nat Neurosci* **13**, 690-699, doi:10.1038/nn.2553 (2010).
- 6 Paredes, M. F. *et al.* Extensive migration of young neurons into the infant human frontal lobe. *Science* **354**, doi:10.1126/science.aaf7073 (2016).
- 7 Henske, E. P., Jozwiak, S., Kingswood, J. C., Sampson, J. R. & Thiele, E. A. Tuberous sclerosis complex. *Nat Rev Dis Primers* **2**, 16035, doi:10.1038/nrdp.2016.35 (2016).
- 8 Thiele, E. A. Managing and understanding epilepsy in tuberous sclerosis complex. *Epilepsia* **51 Suppl 1**, 90-91, doi:10.1111/j.1528-1167.2009.02458.x (2010).
- 9 Ruppe, V. *et al.* Developmental brain abnormalities in tuberous sclerosis complex: a comparative tissue analysis of cortical tubers and perituberal cortex. *Epilepsia* **55**, 539-550, doi:10.1111/epi.12545 (2014).
- 10 Curatolo, P., Bombardieri, R. & Jozwiak, S. Tuberous sclerosis. *The Lancet* **372**, 657-668, doi:10.1016/s0140-6736(08)61279-9 (2008).
- 11 Crino, P. B. Evolving neurobiology of tuberous sclerosis complex. *Acta Neuropathol* **125**, 317-332, doi:10.1007/s00401-013-1085-x (2013).
- 12 Knudson JR., A. G. Mutation and Cancer: Statistical Study of Retinoblastoma. *Proc. Nat. Acad. Sci. USA* **Vol. 68**, pp. 820-823,, doi:10.1073/pnas.68.4.820.
- 13 Feliciano, D. M., Su, T., Lopez, J., Platel, J. C. & Bordey, A. Single-cell Tsc1 knockout during corticogenesis generates tuber-like lesions and reduces seizure threshold in mice. *J Clin Invest* **121**, 1596-1607, doi:10.1172/JCI44909 (2011).
- 14 Feliciano, D. M., Quon, J. L., Su, T., Taylor, M. M. & Bordey, A. Postnatal neurogenesis generates heterotopias, olfactory micronodules and cortical infiltration following single-cell Tsc1 deletion. *Hum Mol Genet* **21**, 799-810, doi:10.1093/hmg/ddr511 (2012).
- 15 Way, S. W. *et al.* Loss of Tsc2 in radial glia models the brain pathology of tuberous sclerosis complex in the mouse. *Hum Mol Genet* **18**, 1252-1265, doi:10.1093/hmg/ddp025 (2009).
- 16 Carson, R. P., Van Nielen, D. L., Winzenburger, P. A. & Ess, K. C. Neuronal and glia abnormalities in Tsc1-deficient forebrain and partial rescue by rapamycin. *Neurobiol Dis* **45**, 369-380, doi:10.1016/j.nbd.2011.08.024 (2012).
- 17 Goto, J. *et al.* Regulable neural progenitor-specific Tsc1 loss yields giant cells with organellar dysfunction in a model of tuberous sclerosis complex. *Proc Natl Acad Sci U S A* **108**, E1070-1079, doi:10.1073/pnas.1106454108 (2011).

- 415 18 Blair, J. D., Hockemeyer, D. & Bateup, H. S. Genetically engineered human  
416 cortical spheroid models of tuberous sclerosis. *Nat Med* **24**, 1568-1578,  
417 doi:10.1038/s41591-018-0139-y (2018).
- 418 19 Qin, W. *et al.* Analysis of TSC cortical tubers by deep sequencing of TSC1,  
419 TSC2 and KRAS demonstrates that small second-hit mutations in these  
420 genes are rare events. *Brain Pathol* **20**, 1096-1105, doi:10.1111/j.1750-  
421 3639.2010.00416.x (2010).
- 422 20 Henske, E. P. *et al.* Allelic Loss Is Frequent in Tuberous Sclerosis Kidney  
423 Lesions but Rare in Brain Lesions. *Am J Hum Genet*, 400-406 (1996).
- 424 21 Martin, K. R. *et al.* The genomic landscape of tuberous sclerosis complex. *Nat*  
425 *Commun* **8**, 15816, doi:10.1038/ncomms15816 (2017).
- 426 22 Chan, J. A. *et al.* Pathogenesis of Tuberous Sclerosis Subependymal Giant  
427 Cell Astrocytomas: Biallelic Inactivation of TSC1 or TSC2 Leads to mTOR  
428 Activation. *Journal of Neuropathology and Experimental Neurology* (2004).
- 429 23 Lancaster, M. A. *et al.* Cerebral organoids model human brain development  
430 and microcephaly. *Nature* **501**, 373-379, doi:10.1038/nature12517 (2013).
- 431 24 Bardy, C. *et al.* Neuronal medium that supports basic synaptic functions and  
432 activity of human neurons in vitro. *Proc Natl Acad Sci U S A* **112**, E3312,  
433 doi:10.1073/pnas.1509741112 (2015).
- 434 25 Park, S. H. *et al.* Tuberous sclerosis in a 20-week gestation fetus:  
435 immunohistochemical study. *Acta Neuropathol* **94**, 180-186 (1997).
- 436 26 Mizuguchi, M. & Takashima, S. Neuropathology of tuberous sclerosis. *Brain &*  
437 *Development*, 508-515 (2001).
- 438 27 Buccoliero, A. M. *et al.* Subependymal giant cell astrocytoma: a lesion with  
439 activated mTOR pathway and constant expression of glutamine synthetase.  
440 *Clin Neuropathol* **35**, 295-301, doi:10.5414/NP300936 (2016).
- 441 28 Buccoliero, A. M. *et al.* Subependymal giant cell astrocytoma (SEGA): Is it an  
442 astrocytoma? Morphological, immunohistochemical and ultrastructural study.  
443 *Neuropathology* **29**, 25-30, doi:10.1111/j.1440-1789.2008.00934.x (2009).
- 444 29 Velasco, S. *et al.* Individual brain organoids reproducibly form cell diversity of  
445 the human cerebral cortex. *Nature* **570**, 523-527, doi:10.1038/s41586-019-  
446 1289-x (2019).
- 447 30 Bhaduri, A. *et al.* Cell stress in cortical organoids impairs molecular subtype  
448 specification. *Nature*, doi:10.1038/s41586-020-1962-0 (2020).
- 449 31 Baser, A. *et al.* Onset of differentiation is post-transcriptionally controlled in  
450 adult neural stem cells. *Nature* **566**, 100-104, doi:10.1038/s41586-019-0888-x  
451 (2019).
- 452 32 LiCausi, F. & Hartman, N. W. Role of mTOR Complexes in Neurogenesis. *Int*  
453 *J Mol Sci* **19**, doi:10.3390/ijms19051544 (2018).
- 454 33 Bulut-Karslioglu, A. *et al.* Inhibition of mTOR induces a paused pluripotent  
455 state. *Nature* **540**, 119-123, doi:10.1038/nature20578 (2016).
- 456 34 Dulken, B. W., Leeman, D. S., Boutet, S. C., Hebestreit, K. & Brunet, A.  
457 Single-Cell Transcriptomic Analysis Defines Heterogeneity and  
458 Transcriptional Dynamics in the Adult Neural Stem Cell Lineage. *Cell Rep* **18**,  
459 777-790, doi:10.1016/j.celrep.2016.12.060 (2017).
- 460 35 Yuzwa, S. A. *et al.* Developmental Emergence of Adult Neural Stem Cells as  
461 Revealed by Single-Cell Transcriptional Profiling. *Cell Rep* **21**, 3970-3986,  
462 doi:10.1016/j.celrep.2017.12.017 (2017).

- 463 36 Basak, O. *et al.* Troy+ brain stem cells cycle through quiescence and regulate  
464 their number by sensing niche occupancy. *Proc Natl Acad Sci U S A* **115**,  
465 E610-E619, doi:10.1073/pnas.1715911114 (2018).
- 466 37 Shin, J. *et al.* Single-Cell RNA-Seq with Waterfall Reveals Molecular  
467 Cascades underlying Adult Neurogenesis. *Cell Stem Cell* **17**, 360-372,  
468 doi:10.1016/j.stem.2015.07.013 (2015).
- 469 38 Parker, W. E. *et al.* Enhanced epidermal growth factor, hepatocyte growth  
470 factor, and vascular endothelial growth factor expression in tuberous sclerosis  
471 complex. *Am J Pathol* **178**, 296-305, doi:10.1016/j.ajpath.2010.11.031 (2011).
- 472 39 Lim, J. S. *et al.* Somatic Mutations in TSC1 and TSC2 Cause Focal Cortical  
473 Dysplasia. *Am J Hum Genet* **100**, 454-472, doi:10.1016/j.ajhg.2017.01.030  
474 (2017).
- 475 40 Vinters, H. V. *et al.* Tuberous sclerosis-related gene expression in normal and  
476 dysplastic brain. *Epilepsy Res* **32**, 12-23 (1998).
- 477 41 Johnson, M. W., Emelin, J. K., Park, S. H. & Vinters, H. V. Co-Localization of  
478 TSC1 and TSC2 Gene Products in Tubers of Patients with Tuberous  
479 Sclerosis. *Brain Pathol*, 45-54 (1999).
- 480 42 Franz, D. N. *et al.* Rapamycin causes regression of astrocytomas in tuberous  
481 sclerosis complex. *Ann Neurol* **59**, 490-498, doi:10.1002/ana.20784 (2006).
- 482 43 Franz, D. N. *et al.* Everolimus for subependymal giant cell astrocytoma in  
483 patients with tuberous sclerosis complex: 2-year open-label extension of the  
484 randomised EXIST-1 study. *The Lancet Oncology* **15**, 1513-1520,  
485 doi:10.1016/s1470-2045(14)70489-9 (2014).
- 486 44 Bissler, J. J. *et al.* Sirolimus for angiomyolipoma in tuberous sclerosis  
487 complex or lymphangiomyomatosis. *N Engl J Med* **358**, 140-151,  
488 doi:10.1056/NEJMoa063564 (2008).
- 489 45 Krueger, D. A. *et al.* Long-term treatment of epilepsy with everolimus in  
490 tuberous sclerosis. *Neurology* **87**, 2408-2415,  
491 doi:10.1212/WNL.0000000000003400 (2016).
- 492 46 Krueger, D. A. *et al.* Everolimus for subependymal giant-cell astrocytomas in  
493 tuberous sclerosis. *N Engl J Med* **363**, 1801-1811,  
494 doi:10.1056/NEJMoa1001671 (2010).
- 495 47 Martins, F. *et al.* A review of oral toxicity associated with mTOR inhibitor  
496 therapy in cancer patients. *Oral Oncol* **49**, 293-298,  
497 doi:10.1016/j.oraloncology.2012.11.008 (2013).
- 498 48 Kerfoot, C. *et al.* Localization of Tuberous Sclerosis 2 mRNA and its Protein  
499 Product Tuberin in Normal Human Brain and in Cerebral Lesions of Patients  
500 with Tuberous Sclerosis. *Brain Pathol*, 367-377 (1996).
- 501 49 Raju, C. S. *et al.* Secretagogin is Expressed by Developing Neocortical  
502 GABAergic Neurons in Humans but not Mice and Increases Neurite Arbor  
503 Size and Complexity. *Cereb Cortex* **28**, 1946-1958,  
504 doi:10.1093/cercor/bhx101 (2018).
- 505 50 Hansen, D. V. *et al.* Non-epithelial stem cells and cortical interneuron  
506 production in the human ganglionic eminences. *Nat Neurosci* **16**, 1576-1587,  
507 doi:10.1038/nn.3541 (2013).
- 508 51 Hodge, R. D. *et al.* Conserved cell types with divergent features in human  
509 versus mouse cortex. *Nature* **573**, 61-68, doi:10.1038/s41586-019-1506-7  
510 (2019).

511 52 Curatolo, P., Moavero, R. & de Vries, P. J. Neurological and neuropsychiatric  
512 aspects of tuberous sclerosis complex. *The Lancet Neurology* **14**, 733-745,  
513 doi:10.1016/s1474-4422(15)00069-1 (2015).  
514



## 515 Acknowledgements

516

517 We thank Paul Möseneder, Hilary Eleanor Gustafson and Simone Wolfinger for  
518 excellent technical assistance; the IMBA Stem Cell Core Facility and Chukwuma  
519 Allison Agu for generation of IPS Cell Lines; Bartlomiej Gebarski and Alex Vogt for  
520 library preparation and sequencing performed at the VBCF NGS Unit  
521 (<https://www.viennabiocenter.org/facilities/next-generation-sequencing/>); the  
522 Genome Engineering Unit of VBCF ProTech facility  
523 (<https://www.viennabiocenter.org/facilities/protein-technologies/>) for cloning of Crispr  
524 Guides, purified SpCas9 protein and assistance during isogenic control line  
525 preparation; Karel Stejskal and Elisabeth Roitinger for mass spectrometry and  
526 analysis performed in the IMBA/IMP Mass spectrometry facility; the IMBA/IMP  
527 Biooptics facility for valuable assistance with FACS sorting and Image acquisition;  
528 Adrian Mancebo Gimenez of the VBCF HistoPathology facility for  
529 immunohistochemistry on primary material; Arabella Meixner for coordinating the  
530 ethical approvals involved in this study; Robert Diehm; Gregor Kasprian for providing  
531 patient MRI; the KIN Biobank of the MUV for providing paraffin-embedded fetal  
532 tissues; Kurtis Auguste for providing primary material; Vicente Elorriaga Benavides for  
533 initial work on primary material and Oliver Wüseke for establishing initial contact with  
534 the MUV. We especially thank all patients and their families for participating in this  
535 study or donating tissue.

536 A.V. was supported by an EMBO Fellowship (ALTF-1112-2019). Work in J.A.K.'s  
537 laboratory is supported by the Austrian Federal Ministry of Education, Science and  
538 Research, the Austrian Academy of Sciences, the City of Vienna and the SFB F78  
539 Stem Cell (F 7803-B). This project has received funding from the European Research  
540 Council (ERC) under the European Union's Horizon 2020 research and innovation  
541 (695642).

542

## 543 Author contributions

544

545 O.L.E, N.S.C., M.F. and J.A.K. designed the study and analysis. Experiments were  
546 performed by O.L.E., N.S.C., T.S., V.E.G., A.M.P., and J.C.. Data analysis was  
547 performed by O.L.E., N.S.C., A.V., M.N. and M.F.P.. The study was supervised by  
548 N.S.C. and J.A.K. The manuscript was prepared by O.L.E, N.S.C. and J.A.K. with  
549 input from all authors.



# Figure 1

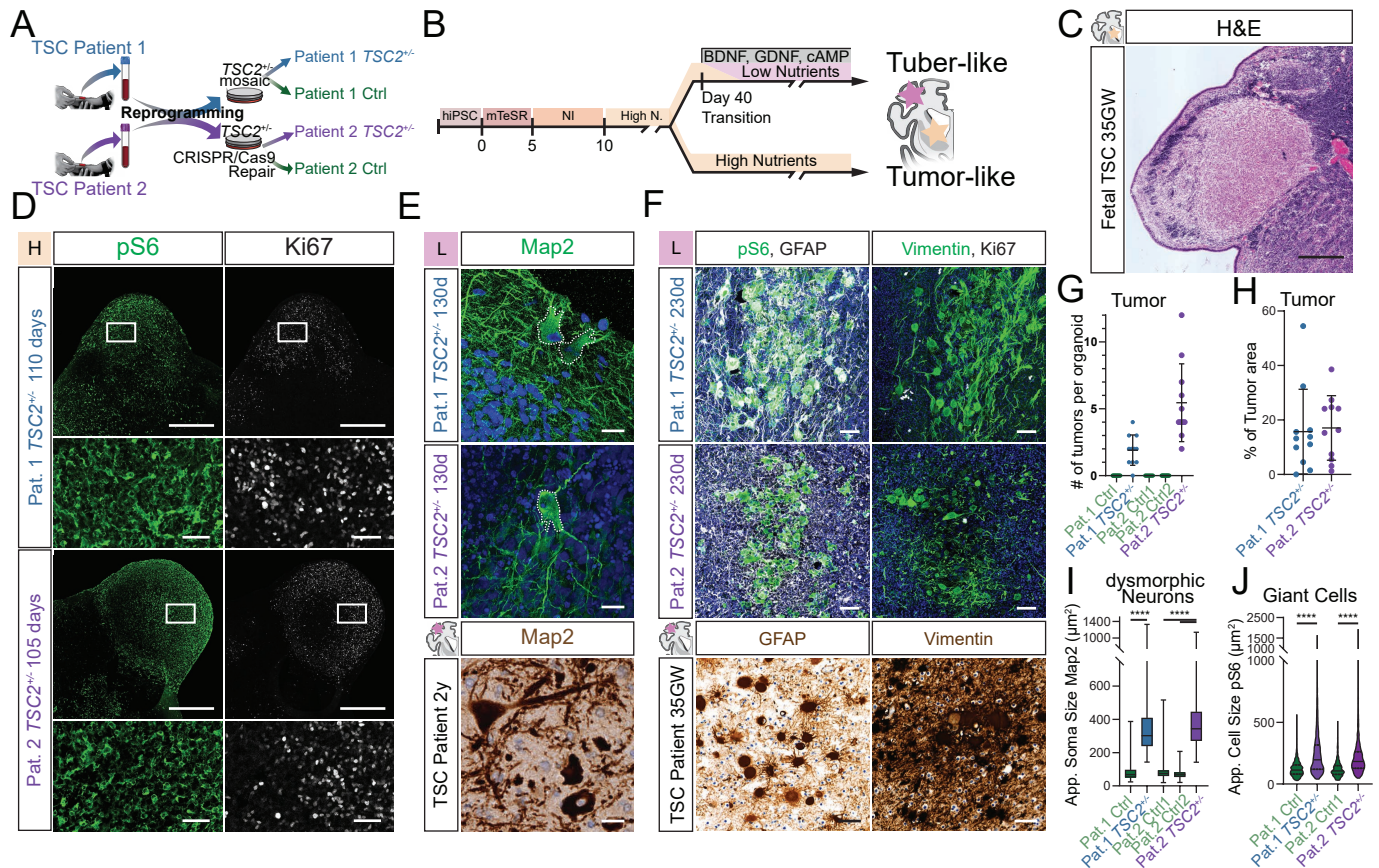

**Figure 1 – *TSC2*<sup>+/-</sup>-derived organoids recapitulate histopathology of TSC**

- A.** Ctrl and *TSC2*<sup>+/-</sup> cell lines were derived from two patients (see Materials and Methods for details).
- B.** High- and Low-nutrition organoid protocols used to model distinct TSC phenotypes.
- C.** H&E staining of 35GW fetal brain depicts histopathology of a fetal SEN.
- D.** pS6 and Ki67 staining on 110- and 105 days-old *TSC2*<sup>+/-</sup>-derived organoids in high-nutrient medium identifies SEN-like structures. Lower panel shows higher magnification of inset.
- E.** Map2 staining on 130 days-old organoids in L-medium shows dysmorphic neurons (top), with comparable morphology to those in a resected tuber of a 2 years-old patient (bottom). Nuclear counterstain with DAPI or hematoxylin.
- F.** pS6 and GFAP identifies giant cells in 230 days-old organoids comparable to giant cells in patient tubers. Giant cells in organoids express Vimentin, as shown in patients. Note that giant cells can be distinguished from tumors by their lower expression of Ki67. Nuclear counterstain with DAPI or hematoxylin.
- G.** Tumors identified as pS6- and Ki67-positive areas are found in Patient 1 (N (batches) =5, n (organoids) =11, mean=1.9, SD=1.08) and Patient 2 (N=4, n=11, mean=5.5, SD=2.7) *TSC2*<sup>+/-</sup>-derived organoids at 110- days. Control organoids of Patient 1 (N=4, n=11) and two clones of repaired Patient 2 (clone 1 N=3, n=11; clone 2 N=2, n=8) showed no tumors.
- H.** Percentage of tumor area of the total organoid area reveals similar tumor burden for organoids derived from both *TSC2*<sup>+/-</sup> Patients (Pat.1 mean=15.7%, SD=14.2%; Pat.2 mean=17.1%, SD=11.3%; p=0.82, t-test).
- I.** Area of the soma in Map2<sup>+</sup> neurons shows that dysmorphic-appearing neurons in *TSC2*<sup>+/-</sup>-derived organoids are roughly 4-fold larger than Map2<sup>+</sup> neurons in control organoids (Pat.1 Ctrl N=2, n=4, 858 neurons, mean= 76.9, SD=34.8; Pat.1 *TSC2*<sup>+/-</sup> N=6, n=11, 241 dysmorphic neurons, mean=354.5, SD=180.4, Pat.1 Ctrl vs. *TSC2*<sup>+/-</sup> p<0.0001; Pat.2 Ctrl1 N=2, n=4, 433 neurons, mean=81.4, SD=38; Pat.2 Ctrl2 N=2, n=5, 597 neurons, mean=70.51, SD=23.8; Pat.2 *TSC2*<sup>+/-</sup> N=2, n=6, 240 dysmorphic neurons, mean=382.7, SD=159.8, Pat.2 Ctrl vs. *TSC2*<sup>+/-</sup> and Pat.2 Ctrl vs. *TSC2*<sup>+/-</sup> both p<0.0001; test: Ordinary One-Way ANOVA).
- J.** Cell area of pS6-positive cells shows significantly enlarged pS6 cells in *TSC2*<sup>+/-</sup>-derived organoids, as compared to cells in either isogenic control. (Pat.1 Ctrl N=3, n=6, 1081 cells, Mean rank=1341; Pat.1 *TSC2*<sup>+/-</sup> N=2, n=7, 810 cells, Mean rank=2274; Pat.2 Ctrl1 N=1, n=4, 608 cells, Mean rank=1291; Pat.2 *TSC2*<sup>+/-</sup> N=3, n=12, 1146 cells, Mean rank=2241; Pat.1 Ctrl vs. *TSC2*<sup>+/-</sup> p<0.0001, Pat.2 Ctrl vs. *TSC2*<sup>+/-</sup> p<0.0001, Pat.1 Ctrl vs. Pat.2 Ctrl p>0.9999, Pat.1 *TSC2*<sup>+/-</sup> vs. Pat.2 *TSC2*<sup>+/-</sup> p>0.9999; Kruskal-Wallis test with Dunn's multiple comparisons test) (Scale bars: C and D: 500µm; E: 20µm; F: 50µm)

## Figure 2

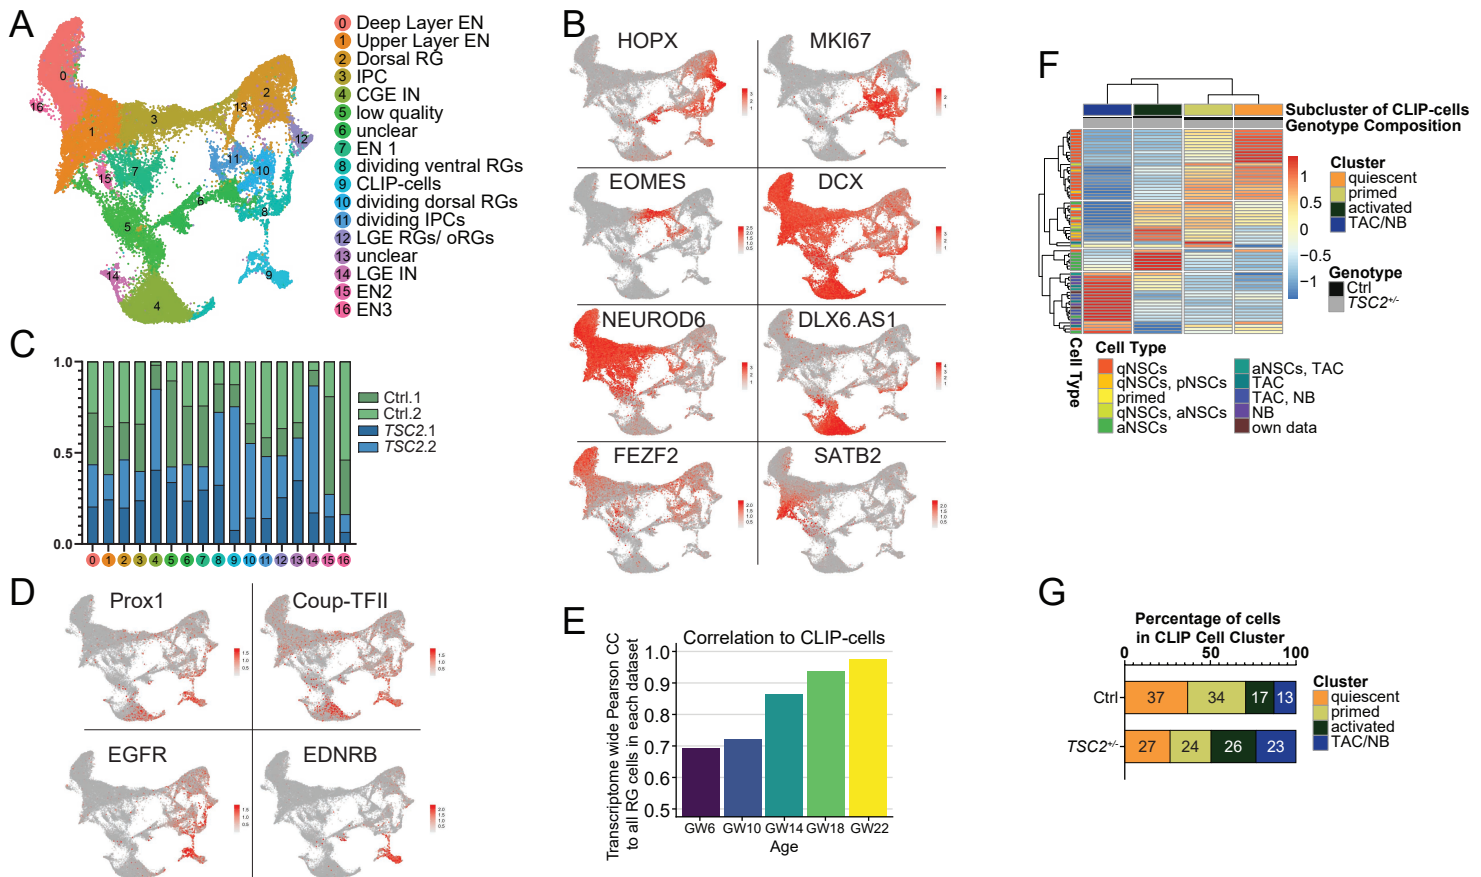

**Fig. 2 – scRNA-seq identifies caudal late interneuron progenitor expanded in *TSC2*<sup>-/-</sup> organoids**

**A.** UMAP projection of all organoid cells from *TSC2*<sup>-/-</sup> and *TSC2*<sup>+/+</sup> (Ctrl) genotypes separates known cell types and a cluster of previously not identified progenitors, the CLIP cells (cluster 9). See Ext. Data Fig. 4A for expression of characteristic markers from differential gene expression analysis that allowed the identification of each cluster.

**B.** Expression of classical cell type-specific markers: HOPX (outer radial glia, oRG), MKI67 (dividing cells), EOMES (also TBR2, dorsal intermediate progenitors), DCX (pan-neuronal), NEUROD6 (excitatory neurons, EN), DLX6.AS1 (inhibitory neurons), FEZF2 (deep layer EN), and SATB2 (upper layer EN).

**C.** The cellular composition of each cluster from *TSC2*<sup>-/-</sup> (Blue) and Ctrl (Green) genotypes shows that specific cell types are expanded in *TSC2*<sup>-/-</sup> organoids. The shades of green and blue show cells from individual organoids. All cell numbers were down-sampled to the smallest dataset. The expanded cell types included interneurons (cluster 4, 14), as well as CLIP-cells (cluster 9) and dividing ventral RGs (cluster 8). Note that LGE RGs/ oRGs (cluster 12) showed similar cell numbers within each genotype.

**D.** The expression of CGE-associated markers Prox1, Coup-TFII and EGFR in the CLIP-cells indicate their CGE origin. CLIP-cells also show other unique markers, such as Endothelin Receptor B (EDNRB). See Ext. Data Fig. 4B for expression of more markers.

**E.** Transcriptome wide Pearson Correlation of organoid derived CLIP-cells to fetal RGs of different gestational ages derived from primary dataset<sup>29</sup>. Organoid CLIP-cells show the highest similarity to the oldest dataset (GW22).

**F.** Clustering of all CLIP-cells and a genes discriminating different activation states of progenitors (genes derived from published scRNA-seq studies). For simplification, the average expression of each gene per group of cells is shown (See Ext. Data Fig. 5A and B for detailed heatmap). Genes were annotated from quiescent over primed and activated NSCs to transient amplifying cells (TAC) and neuroblasts with shared genes on each transition as in The heatmap identified four gene signatures (on the left side, from top to bottom): 1. quiescent, 2. mixed quiescent, primed and activated, 3. activated and 4. TAC and neuroblast genes. Based on distinct expression of these genes, we identified four cell sub-clusters, from left to right: TAC/ NBs, activated-, primed-, and quiescent NSCs. The percentage of each genotype contributing to the respective cell group is shown in gray/black on top of the heatmap.

**G.** Percentage of each activation state within CLIP-cells from Ctrl and *TSC2*<sup>-/-</sup> organoids. In Ctrl, most cells are quiescent or primed (q=37%, p=34%, a=17%, TAC/NB=13%), while in *TSC2*<sup>-/-</sup> organoids CLIP-cells are biased towards activated states (q=27%, p=24%, a=26%, TAC/NB=23%).



## Figure 3

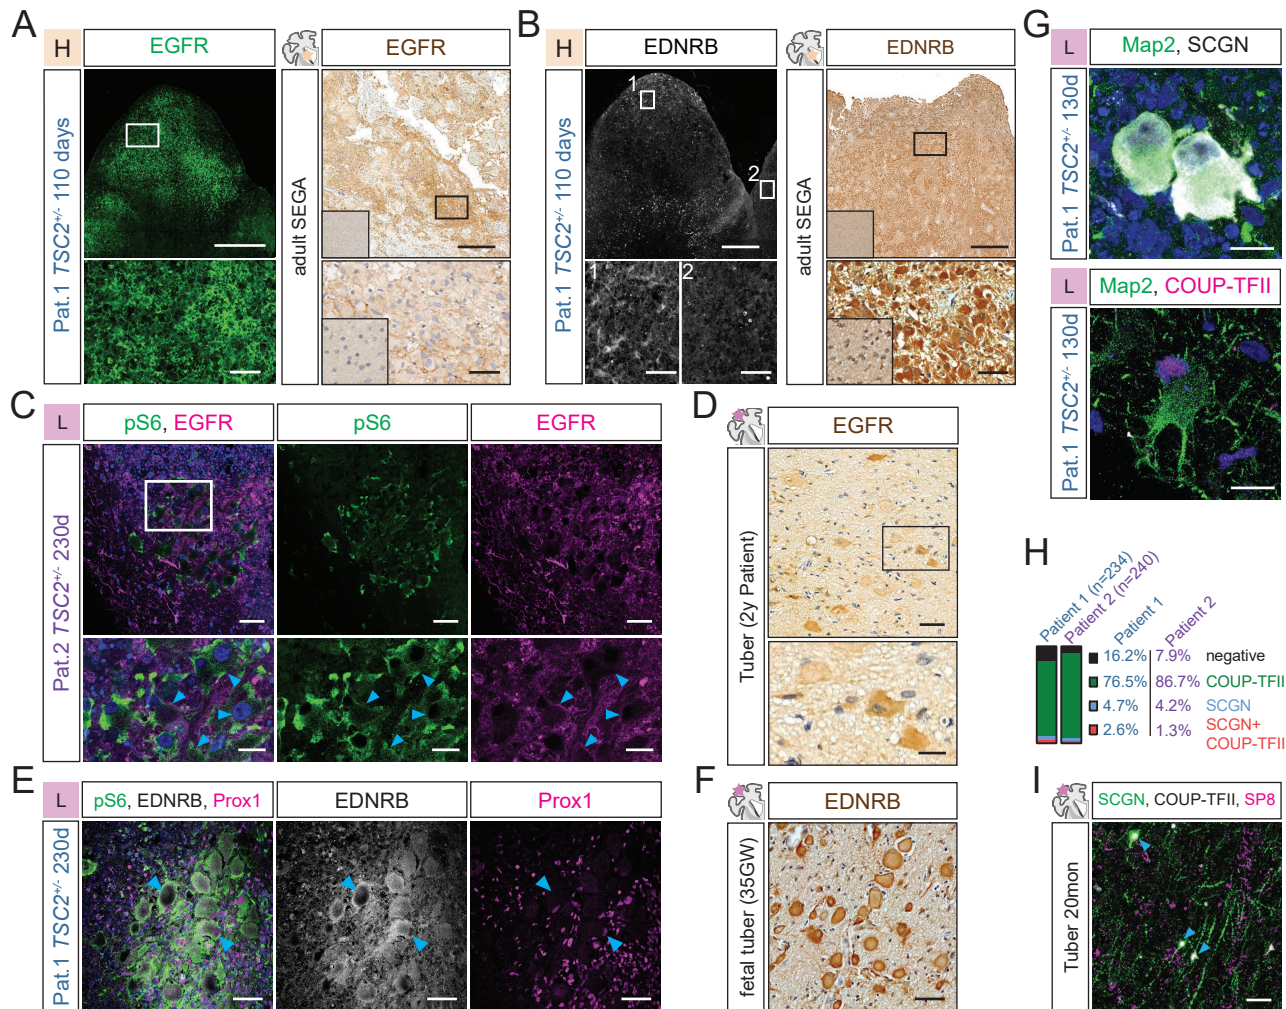

**Fig. 3 – CLIP-cells generate all abnormal cell types of TSC brain pathology**

**A.** Left: Immunostaining for EGFR identifies tumors in 110 days-old *TSC2*<sup>+/-</sup>-derived organoids grown in H-medium. See Ext. Data Fig. 7C and D for co-staining with COUP-TFII. Lower panel is higher magnification of tumor region. Right: EGFR expression is present in adult SEGAs. Inset in primary tissue staining shows that a cortex from a healthy control is negative for EGFR. Lower panel is higher magnification of tumor region.

**B.** Left: EDNRB is expressed in tumors in 110 days-old *TSC2*<sup>+/-</sup>-derived organoids. Zoom-in #1 shows a tumor region expressing EDNRB and #2 shows a negative region outside of the tumor. See Ext. Data Fig. 8A for co-staining with PROX1 and pS6. Right: EDNRB expression is also found in adult SEGAs. Lower panel is higher magnification of tumor region. Inset in primary tissue staining shows healthy control cortex negative for EDNRB.

**C.** Giant cells in 230 days-old *TSC2*<sup>+/-</sup>-derived organoids grown in L-medium co-express pS6 and EGFR. Note that EGFR is localized to the membrane of giant cells. Blue arrows mark examples of EGFR-positive membrane. Lower panel shows higher magnification

**D.** EGFR is found in giant cells in a resected postnatal cortical tuber of a 2 years-old patient.

**E.** pS6, EDNRB and PROX1 are co-expressed in Giant cells in in 230 days-old organoids *TSC2*<sup>+/-</sup>-derived organoids grown in L-medium.

**F.** EDNRB is also expressed in giant cells of a fetal TSC tuber. See Ext. Data Fig. 8E for postnatal tuber example.

**G.** Dysmorphic neurons in *TSC2*<sup>+/-</sup>-derived organoids in L-medium express SCGN and/or COUP-TFII and show enlarged soma and thickened processes. See Ext. Data Fig. 10A for Ctrl and further examples.

**H.** Quantification of dysmorphic neurons expressing CGE-associated markers in *TSC2*<sup>+/-</sup>-derived organoids. Note that dysmorphic neurons are only found in *TSC2*<sup>+/-</sup>, but not in controls (Fig. 1I).

**I.** SCGN, COUP-TFII and SP8 in a resected cortical tuber of a 20 months-old TSC case identifies enlarged, dysmorphic neurons (blue arrows). See Ext. Data Fig. 10B for healthy control. See Ext. Data Fig. 10C for fetal tuber example.

(Scale bars: overview images A, B: 500µm; Zoom-in A, B.: 50µm; overview C, D, E, F, I: 50µm; Inset C, D: 20µm; G and H: 15µm)

## Figure 4

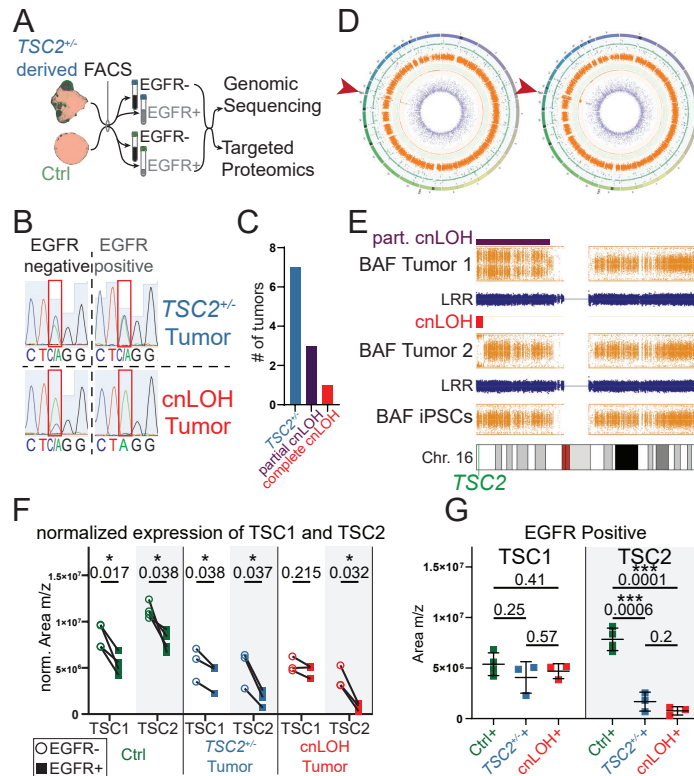

**Fig. 4 – Sequencing and targeted PRM on TSC tumors**

**A.** FACS strategy enriching for tumor population in *TSC2*<sup>+/-</sup>-derived organoids using EGFR expression.

**B.** Mutation locus in the *TSC2* gene from matched EGFR-negative and -positive samples of heterozygous and cnLOH tumor show loss of the WT (C) allele.

**C.** 7 of 11 *TSC2*<sup>+/-</sup>-derived organoids genotyped after FACS were heterozygous, three showed partial cnLOH, and only one showed complete cnLOH, reflecting different tumor stages.

**D.** Circos plots of WGS of two EGFR-positive tumor samples from *TSC2*<sup>+/-</sup>-derived organoids with partial and complete cnLOH samples using *TSC2*<sup>+/-</sup>-iPSCs as a reference. There are no alterations on other chromosomal loci except for *TSC2* locus on Chr. 16 (red arrows) compared to iPSCs. See panel E for close-up of Chr. 16 and Ext. Data Fig. 13 for further explanation.

**E.** More detailed depiction of cnLOH around *TSC2* locus. BAF (orange) indicates different regions of loss-of-heterozygosity around *TSC2* locus along chromosome 16 for both tumors while iPSC reference remains heterozygous. Unchanged log-R ratio (LRR, blue) indicates that no aneuploidy occurred, thus copy numbers remained the same. This gives the definite diagnosis of a copy-neutral loss-of-heterozygosity, characteristic for TSC tumors. Note that in tumor 2 all cells have cnLOH shown as a complete shift of BAF along the Y-axis. In tumor 1 the shift is less clear indicating mixed cnLOH and *TSC2*<sup>+/-</sup> tumor cells.

**F.** Normalized protein expression of TSC1 and TSC2 in matched EGFR-negative (circle) and EGFR-positive (square) populations sorted from 3 different genotypes (Ctrl; *TSC2*<sup>+/-</sup> tumor; cnLOH tumor). Protein quantification shows that EGFR-positive cells have decreased TSC2 expression in all cases, while TSC1 expression is less extreme. The loss of TSC2 protein in EGFR+ samples is further decreased by the stepwise loss of the healthy *TSC2* allele (*TSC2*<sup>+/+</sup> in Ctrl, *TSC2*<sup>+/-</sup>, and *TSC2*<sup>-/-</sup>). (ctrl N=2, n=4; *TSC2*<sup>+/-</sup> N=2, n=3; cnLOH N=2, n=3; matched EGFR-positive and -negative for each sample; p-values of paired t-test above samples).

**G.** Directly comparing TSC1 or TSC2 protein levels across genotypes reveals that EGFR-positive tumor samples drastically downregulate TSC2, more than expected by the 50% loss in gene dosage. TSC1 levels are similar in EGFR-positive populations of all three genotypes. Statistical Test: F: Paired t-test, G: unpaired t-test

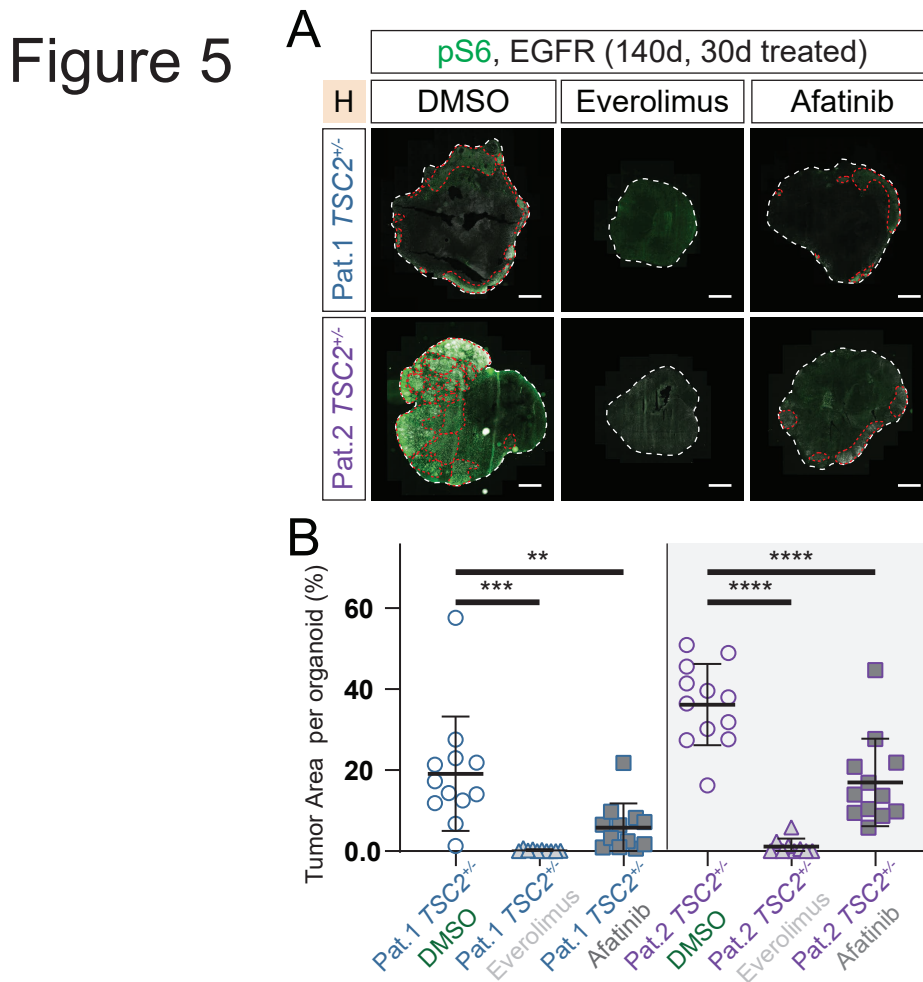

**Fig. 5 – EGFR-inhibition reduces tumor burden**

**A.** 30 days of treatment were initiated at 110 days after EB formation (see Ext. Data. Fig. 15A) Immunostaining for pS6 and EGFR identifies tumors (red lines) in the control group (DMSO) in both patients. Tumors are severely reduced by Afatinib treatment, and completely disappear after Everolimus treatment.

**B.** Quantification of tumor area per organoid. All sections of each organoid stained on one slide were used for quantification. Tumor was identified as region of overlapping pS6 and EGFR staining. While tumors are detected in DMSO-control for both patients, Afatinib or Everolimus treatment both reduce tumor burden significantly. (N=3, n=12 for Pat.1 and Pat.2 *TSC2<sup>+/-</sup>*-DMSO and Afa; N=3, n=10 for Pat.1 *TSC2<sup>+/-</sup>*-Eve; N=3, n=9 for Pat.2 *TSC2<sup>+/-</sup>*-Eve; Pat.1 *TSC2<sup>+/-</sup>*-DMSO mean=19.1%, SD=13.5%; Pat.1 *TSC2<sup>+/-</sup>*-Eve mean=0.19%, SD=0.25%; Pat.1 *TSC2<sup>+/-</sup>*-Afa mean=5.81%, SD=5.69%; Pat.2 *TSC2<sup>+/-</sup>*-DMSO mean=36.19%, SD=9.62%; Pat.2 *TSC2<sup>+/-</sup>*-Eve mean=1.12%, SD=1.86%; Pat.2 *TSC2<sup>+/-</sup>*-Afa mean=16.99%, SD=10.36%; Pat.1 *TSC2<sup>+/-</sup>*-DMSO vs. Eve p=0.0001, Pat.1 *TSC2<sup>+/-</sup>*-DMSO vs. Afa p=0.0081, Pat.2 *TSC2<sup>+/-</sup>*-DMSO vs. Eve p<0.0001, Pat.2 *TSC2<sup>+/-</sup>*-DMSO vs. Afa p<0.0001; Ordinary one-way ANOVA, Tukey's multiple comparisons test) (Scale bars: A.: 1mm)



## 1 Materials & Methods

2

### 3 Patient sample selection

4

5 The study was approved by the local ethics committee of the Medical University of  
6 Vienna (MUV). Screened were all patients with TSC included into our TSC data  
7 registry. Study inclusion criteria were as follows: 1) TSC proven by clinical  
8 characteristics and molecular testing. 2) age between 0 and 18 years. 3) TSC-  
9 associated drug-resistant epilepsy. 4) continuous follow-up at the department of  
10 pediatrics TSC center for at least 2 years. After informed consent, 10 ml blood was  
11 collected from three selected patients for iPSC reprogramming. All clinical data were  
12 derived from the MUV TSC patient registry (e.g. gender, age, seizure frequency,  
13 seizure onset, pre- and postnatal MRIs and AEDs). Re-evaluation of formalin-fixed  
14 and paraffin-embedded (FFPE) TSC brain material (cortical tubers and SEGAs) of one  
15 included iPSC patient and several other TSC patients was performed. In addition,  
16 brain material of fetal autopsy cases with TSC were also included for comparative  
17 studies. Age- and region-matched autopsy tissue samples from patients without a  
18 history of any neurological disease including epilepsy served as control group.

19

### 20 Generation of IPS cells

21

22 IPS cells were generated from PBMCs isolated from patient blood samples as  
23 described<sup>1</sup>.

24 Briefly, 10 ml blood was collected in sodium citrate collection tubes. PBMCs were  
25 isolated via a Ficoll-Paque density gradient and erythroblasts were expanded for 9  
26 days. Erythroblast-enriched populations were infected with Sendai Vectors expressing  
27 human OCT3/4, SOX2, KLF4 and cMYC (CytoTune, Life Technologies, A1377801).

28 Three days after infection, cells were switched to mouse embryonic fibroblast feeder  
29 layers and medium was changed to iPSC media (KoSR + FGF2) 5 days post-infection.

30 10 to 21 days after infection, the transduced cells began to form colonies that exhibited  
31 iPSC morphology. iPSC colonies were picked and passaged every 5 to 7 days. iPSCs  
32 were passaged 15 times before being transferred to the Cellartis DEF-CS 500 culture  
33 system (Takara).

34

35

36

### 37 **IPS cell culture**

38

39 iPSCs cell culture was performed using the Cellartis DEF-CS 500 culture system  
40 (Takara) according to the manufacturers' instructions. Briefly, cells were split every  
41 third day and 400.000 cells were seeded per well of a 6 well plate. Cells were banked  
42 at different passages. For experiments, cells were used from passage 40 to 50.  
43 Genomic integrity was analyzed at passage 40 on an Infinium PsychArray v1.3  
44 (Illumina) and compared to data from PBMCs.

45

### 46 **Generation of isogenic control cell lines:**

47

48 Reprogramming of PBMCs from Patient 1 generated iPSC clones with the genotypes  
49  $TSC2^{+/-}$  and  $TSC2^{+/+}$ , indicating, that Patient 1 carried a mosaic heterozygous mutation  
50 in *TSC2*. Mosaicism was confirmed in PBMCs.

51

52 Isogenic control cell lines of patient 2 were generated using Crispr/Cas9. *S.pyogenes*  
53 Cas9 protein with two nuclear localization signals was purified as previously  
54 described<sup>2</sup>. gRNA transcription was performed with HiScribe T7 High Yield RNA  
55 Synthesis Kit (NEB) according to the manufacturer's protocol and gRNAs were purified  
56 via Phenol:Chloroform:Isoamyl alcohol (25:24:1; Applichem) extraction followed by  
57 ethanol precipitation. The HDR template (custom ssODN (Integrated DNA  
58 Technologies)) was designed to span 100 bp up and downstream of the mutation site.  
59 For generation of isogenic control cell lines, iPSCs were grown in DEF-CS. Cells were  
60 washed with D-PBS<sup>-/-</sup>. TrypLE Select (Thermo Fisher Scientific) was added to cells  
61 and cells were incubated for 5 min at 37°C. Plate was gently tapped to dissociate cells,  
62 resuspended in supplemented DEF-CS medium and counted.  $1.5 \times 10^6$  cells were  
63 spun down and washed with D-PBS<sup>-/-</sup> once. Cells were resuspended in Buffer R of  
64 the Neon Transfection System (Thermo Fisher Scientific) at a concentration of  $2 \times 10^7$   
65 cells/ml. 0.45  $\mu$ l of sgRNA (1  $\mu$ g/ $\mu$ l), 0.75  $\mu$ l electroporation ready Cas9 protein (3 $\mu$ g/ $\mu$ l)  
66 and 6.3  $\mu$ l of resuspension buffer were combined to for the Cas9/sgRNA RNP

67 complex, reaction was mixed and incubated at 37°C for 5 min. 2 µl of the HDR  
68 template (100 µM) was added to the Cas9/sgRNA RNP complex and combined with  
69 the cell suspension. Electroporations were performed using a Neon® Transfection  
70 System (Thermo Fisher Scientific) with 100 µl Neon® Pipette Tips using the ES cells  
71 electroporation protocol (1400 V, 10 ms, 3 pulses). Cells were seeded in one well of a  
72 6 well plate in supplemented DEF-CS (Takara). After a recovery period of 5 days, cells  
73 were FACS sorted in 96 well plates with 1 cell/ well. 48 h after sorting, 100 µl of fresh  
74 supplemented DEF-CS medium was added. After expansion, gDNA was extracted  
75 using DNA QuickExtract Solution (Lucigen) followed by PCR and Sequencing to  
76 determine efficient rescue.

77

78

### 79 **Organoid generation:**

80

81 To generate organoids from DEF-CS cultured iPSCs, 400.000 cells were seeded per  
82 well of a 6 well plate. After 2 days, cells were washed with DPBS<sup>-/-</sup> and incubated with  
83 300 µl TryLE Express (Thermo Fisher Scientific) for 5 minutes. 1 ml supplemented  
84 Def-CS (basal medium + GF1,2,3) was added and iPSCs were triturated and  
85 subsequently transferred to a tube with 700 ul supplemented Def-CS. Cells were  
86 counted and the required number of cells was added to a new tube. Cells were spun  
87 down (120 x g) for 3 min and resuspended in the required amount of mTeSR (Stem  
88 Cell Technologies) + Rock Inhibitor (RI): 9000 cells were seeded per well of a low  
89 attachment 96 well plate in 150 µl mTeSR + RI. The resulting embryoid bodies were  
90 fed 2 and 4 days after EB generation with mTeSR without RI. At day 5 after EB  
91 generation, medium was replaced with Neural Induction medium consisting of  
92 DMEM/F12 (Thermo Fisher Scientific) with 1% N2 Supplement (Thermo Fisher  
93 Scientific), 1% MEM-NEAA (Sigma Aldrich), 1% Glutamax (Thermo Fisher Scientific)  
94 and 5 ug/ml Heparin. Medium was changed at day 7 and day 9 after EB generation.  
95 10 days after EB generation, EBs were embedded in Matrigel (Corning) as described  
96 <sup>3</sup>. Embedded EBs were cultured in High Nutrient Medium - Vitamin A (HN-A) consisting  
97 of 50% DMEM/F12 (Thermo Fisher Scientific), 50% Neurobasal (Thermo Fisher  
98 Scientific), 1 % N2 Supplement (Thermo Fisher Scientific), 2% B27 - Vitamin A  
99 (Thermo Fisher Scientific), 1% Glutamax (Thermo Fisher Scientific), 0,5% MEM-



100 NEAA (Sigma Aldrich,), 1 % Penicillin/Streptomycin (Sigma Aldrich) and 0.025%  
101 Insulin solution (Sigma Aldrich). Organoids were cultured in stationary culture for 3  
102 days. 13 days after organoid generation, medium was changed to High Nutrient  
103 Medium + Vitamin A (HN+A) consisting of 50% DMEM/F12 (Thermo Fisher Scientific),  
104 50% Neurobasal (Thermo Fisher Scientific), 1 % N2 Supplement (Thermo Fisher  
105 Scientific), 2% B27 + Vitamin A (50X, Thermo Fisher Scientific), 1% Glutamax  
106 (Thermo Fisher Scientific), 0.5% MEM-NEAA (Sigma Aldrich), 1 %  
107 Penicillin/Streptomycin, 0.025% Insulin solution (Sigma Aldrich) and 2g/l Bicarbonate  
108 (Sigma Aldrich) and organoids were moved to orbital shakers in 6 or 10 cm dishes.  
109 Organoids were fed twice a week. 40 d after organoid generation, organoids were  
110 either cultured in HN+A or were transferred gradually to Low-Nutrient medium (LN)  
111 consisting of BrainPhys Neuronal Medium (Stem Cell Technologies), 2% B27+A (50X,  
112 Thermo Fisher Scientific), 1% N2 supplement (Thermo Fisher Scientific), 200 nM  
113 Ascorbic Acid (Sigma Aldrich), 0.2% CD Lipid Concentrate (Thermo Fisher Scientific),  
114 1% Penicillin/Streptomycin, 1% Matrigel (Corning)<sup>4</sup>. In addition, the glucose  
115 concentration of LN was adjusted to 10 mM and the following supplements were added  
116 freshly before use: 20 ng/ml BDNF (Stem Cell Technologies), 20 ng/ml GDNF (Stem  
117 Cell Technologies) and 1 mM db-cAMP (Santa Cruz). Gradual transfer from HN+A to  
118 LN was performed as follows with feedings performed every third day, thus the total  
119 transition time was 12 days: 1. HN+A 75%:25% LN, 2. HN+A 50%:50% LN, 3. HN+A  
120 25%:75% LN, 4. HN+A 0%:100% LN.

121

122

### 123 **Treatment of organoids with Everolimus and Afatinib:**

124

125 Organoids were treated with 20 nM of Everolimus (Abcam) as described<sup>5</sup>. A stock  
126 solution of 10  $\mu$ M was prepared in DMSO (Sigma Aldrich) and diluted 1:500 in medium.  
127 Afatinib (Selleckchem) was used at a final concentration of 1  $\mu$ M as published<sup>6</sup>. A  
128 stock solution of 500  $\mu$ M was prepared in DMSO (Sigma Aldrich) and diluted 1:500 in  
129 medium. DMSO was used as a control and diluted 1:500 in medium. DMSO,  
130 Everolimus or Afatinib were freshly added to High Nutrient Medium and used to feed  
131 organoids from day 110 on. Organoids were fed with medium containing freshly added

132 inhibitors every three days. After 30 days of treatment (d140) organoids were fixed  
133 and analyzed.

134

135

136 **FACS sorting:**

137

138 EGFR+ cells were isolated using Flow cytometry. Briefly, organoids were harvested,  
139 washed with DPBS-/- (Thermo Fisher Scientific) and added to a gentleMACS  
140 dissociator C tube (Miltenyi). 2 ml of Trypsin (Sigma Aldrich)/Accutase (Sigma Aldrich)  
141 (1:1) was added containing 10 U/ml DNaseI (Thermo Fisher Scientific). Organoids  
142 were dissociated using the 37C\_NTDK\_1 program on a gentleMACS™ Octo  
143 Dissociator with Heaters (Miltenyi). After dissociation, cells were briefly spun down to  
144 collect the sample, passed through a 70 µm cell strainer (Falcon) and 8 ml of PBS with  
145 10% FBS was added. Cells were spun at 400xg for 4 min and supernatant was  
146 removed. Cells were resuspended in 2 ml PBS with 10% FBS, counted and 5 µL/10<sup>6</sup>  
147 cells of Human EGFR (Research Grade Cetuximab Biosimilar) Alexa Fluor® 488-  
148 conjugated Antibody (R&D Systems) was added. Cells were incubated for 30 min on  
149 ice and washed 3 times with 1 ml of PBS with 10% FBS. Cells were then passed  
150 through a 35 µm cell strainer and sorted on a SH800 Cell Sorter (Sony).

151

152

153 **Immunohistochemistry on paraffin embedded human samples:**

154

155 Use of human brain samples for histological analysis was approved by the local ethics  
156 committee of the Medical University of Vienna. Human brain material was processed  
157 for routine histopathology. Tissue was formalin fixed and embedded in paraffin and  
158 3µm thin FFPE tissue sections were prepared. Immunohistochemistry for EGFR,  
159 TSC2, MAP2 and GFAP was performed using the Bond III automatic stainer (Leica)  
160 using the conditions described (Extended Data Table 1). Immunohistochemistry for  
161 Vimentin, GFAP and Secretagogen was performed using the EnVision™ FLEX+ kit  
162 (Dako) as detection system and diaminobenzidine (DAB) as chromogen with the  
163 conditions described (Extended Data Table 1). The histological staining procedure  
164 occurred with the help of coverplates (Thermo Fisher Scientific, Glass Coverplates).  
165 All sections were counterstained with haematoxylin.

166

167 **Immunohistochemistry on frozen human brain samples:**

168

169 Tissue was collected with consent in strict observance of the legal and institutional  
170 ethical regulations of the University of California San Francisco Committee on Human  
171 Research. Protocols for use of prenatal human tissues were approved by the Human  
172 Gamete, Embryo and Stem Cell Research Committee (institutional review board) at  
173 the University of California, San Francisco and postnatal autopsy and surgical tissues  
174 were obtained via the UCSF Pediatric Neuropathology Research Laboratory and Brain  
175 Tumor Research Center. Brains were fixed in 4% paraformaldehyde for 2 days, and  
176 then cryoprotected in a 30% sucrose solution. Blocks were cut into 30-micron sections  
177 on a cryostat and mounted on glass slides for immunohistochemistry. Frozen slides  
178 were allowed to equilibrate to room temperature for 3 hours. 10 minutes antigen  
179 retrieval was conducted at 95°C in 10 mM Na Citrate buffer, pH=6.0. Following antigen  
180 retrieval, slides were washed with TNT (0.05% TX100 in PBS) for 10 minutes, placed  
181 in 1% H<sub>2</sub>O<sub>2</sub> in PBS for 90 minutes, and then blocked with TNB solution (0.1 M Tris-  
182 HCl, pH 7.5, 0.15 M NaCl, 0.5% blocking reagent from PerkinElmer) for 1 hour. Slides  
183 were incubated in primary antibodies overnight at 4°C (Extended Data Table 1) and in  
184 biotinylated secondary antibodies (Jackson Immunoresearch Laboratories) for 2.5  
185 hours at room temperature. All antibodies were diluted in TNB solution from  
186 PerkinElmer. Sections were then incubated for 30 min in streptavidin-horseradish  
187 peroxidase that was diluted (1:200) with TNB. Tyramide signal amplification (Perkin-  
188 Elmer) was used for some antigens. Sections were incubated in tyramide-conjugated  
189 fluorophores at the following dilutions: Fluorescein, 1:50 (4.5 min) ; Opal 570, 1:100  
190 (10 min); Cy5, 1:50 (4.5 min). Sections were imaged on a Leica TCS SP8 microscope.

191

192 **Immunohistochemistry on frozen organoid samples:**

193

194 Immunohistochemistry was performed as described<sup>7,8</sup>. Briefly, organoids were fixed in  
195 4% paraformaldehyde for 20 - 40 min at room temperature. Organoids were washed  
196 with PBS three times for 10 min each at room temperature and then allowed to sink in  
197 30% sucrose at 4 °C. Organoids were embedded in 7.5% gelatin (Sigma Aldrich) in  
198 10% sucrose (Sigma Aldrich) solution and sectioned at 20 µm on a Cryostat (Leica  
199 NX70). For immunohistochemistry, sections were blocked and permeabilized in 0.25%

200 TritonX-100 with 4% normal donkey serum (Millipore) for 1 hour at room temperature.  
201 Sections were then incubated at least 5 hours to overnight at room temperature with  
202 primary antibodies in 0.1% Triton X-100 with 4% normal donkey serum (Millipore) in  
203 PBS. Sections were washed 3 times in PBS. Secondary antibodies were incubated for  
204 1hr and afterwards sections were washed 3 times in PBS. DAPI was added to  
205 secondary antibody to mark nuclei. Secondary antibodies labeled with Alexafluor 488,  
206 568, or 647 (Invitrogen) were used for detection. Slides were mounted using  
207 Fluorescent mounting medium (Dako).

208 All antibodies used have been validated for the performed application as evidenced  
209 by validation profile on Antibodypedia, or manufacturer's website.

210

### 211 **Laser microdissection:**

212

213 Organoids were fixed in 4% paraformaldehyde for 20 min at room temperature.  
214 Organoids were washed with PBS three times for 10 min each at room temperature  
215 and then allowed to sink in 30% sucrose (Sigma Aldrich) at 4 °C. Organoids were then  
216 embedded in 7.5% gelatin (Sigma Aldrich) in 10% sucrose solution and sectioned at  
217 20 µm on a Cryostat (Leica NX70). Consecutive slides were mounted on glass slides  
218 and immunohistochemistry was performed to identify tumors or mounted on Frame  
219 Slides for microdissection (Leica; 11505190). Tumor regions were identified by EGFR  
220 and pS6 staining on consecutive slides and corresponding regions were dissected  
221 using the LMD6500 laser microdissection system (Leica). DNA was isolated from  
222 dissected regions using the DirectPCR® Lysis Reagent Tail (PepqLab) containing 0.375  
223 mg/ml Proteinase K (Thermo Fisher Scientific) according to the manufacturer's  
224 instructions.

225

### 226 **Microscopy:**

227

228 Images were acquired on LSM880 and LSM800 confocal laser scanning microscopes  
229 (Zeiss). Large overview images were acquired using the Panoramic Slide Scanner  
230 250 Flash II or III system (3DHistech).

231

### 232 **Quantification of immunofluorescence:**

233

234 Quantifications of areas of dysmorphic neurons and giant cells were performed using  
235 ImageJ Software. For dysmorphic neurons wild type references were generated by  
236 analyzing regions of 6 organoids from 2 batches for each isogenic control line. For  
237 *TSC2<sup>+/-</sup>* organoids 5 regions of about 500 $\mu$ m x 500 $\mu$ m with dysmorphic neurons were  
238 analyzed. 20 to 40 dysmorphic neurons were analyzed per organoid (Ext. Data Fig.  
239 3F). Only after analysis of the size in Map2 staining, the expression of COUP-TFII and  
240 SCGN was analyzed.

241

242 For giant cells, size of pS6 expressing cells in one region of roughly 650 $\mu$ m x 650 $\mu$ m  
243 per organoid was analyzed. Whole organoids were acquired with the Panoramic  
244 Slide Scanner 250 Flash II or III system (3DHitech) and then regions exported using  
245 the CaseViewer Software (3DHitech). Size analysis was performed in ImageJ. For  
246 isogenic Ctrl representative regions were chosen randomly. For *TSC2<sup>+/-</sup>* organoids  
247 regions with giant cells were chosen. Evident by the analysis also normal sized pS6  
248 cells were analyzed in *TSC2<sup>+/-</sup>* organoids.

249

250 For the analysis of TSC2 expression in giant cells one region of giant cells per  
251 organoid was selected in whole organoid scans with the Panoramic Slide Scanner  
252 250 Flash II or III system (3DHitech). Expression of TSC2 was evaluated in visually  
253 enlarged appearing giant cells, as the size differences can be clearly distinguished by  
254 eye.

255 For quantifications of tumor areas, whole organoid sections were acquired with the  
256 Panoramic Slide Scanner 250 Flash II or III system (3DHitech) and exported to  
257 ImageJ. Areas with double positive staining for Ki67 and pS6 were measured using  
258 the circle tool.

259 Quantifications of tumor areas for treatment experiments were performed using the  
260 CaseViewer Software (3DHitech). Briefly, whole organoid sections were acquired  
261 with the Panoramic Slide Scanner 250 Flash II or III system (3DHitech). Areas with  
262 double positive staining for pS6 and EGFR were measured using the circle tool.

263

264

265 **Single cell RNA sequencing:**

266

267 Organoids were harvested, washed with DPBS-/- and incubated in Trypsin (Sigma  
268 Aldrich)/Accutase (Sigma Aldrich) (1:1) containing 10 U/ml DNaseI (Thermo Fisher  
269 Scientific) at 37°C on a thermoblock with agitation (800 rpm) for 40-60 min. A half  
270 volume of ice-cold DPBS-/- (Thermo Fisher Scientific) with 0.04% BSA (Sigma-  
271 Aldrich) was added to the dissociated cells. The solution was passed twice through a  
272 35 µm cell strainer and centrifuged for 5 min at 400g. Cells were washed with once  
273 with DPBS-/- (Thermo Fisher Scientific) with 0.04% BSA (Sigma Aldrich) and  
274 resuspended in 150 µl ice-cold PBS containing 0.04% BSA (Sigma Aldrich). Cells  
275 were counted and 16000 cells were loaded per channel (to give estimated recovery of  
276 10,000 cells per channel) onto a Chromium Single Cell 3' B Chip (10x Genomics, PN-  
277 1000073) and processed through the Chromium controller to generate single-cell  
278 GEMs (Gel Beads in Emulsion). scRNA-seq libraries were prepared with the  
279 Chromium Single Cell 3' Library & Gel Bead Kit v.3 (10x Genomics, PN-1000075).  
280 Libraries were pooled and sequenced paired end (R1:26, R2:98 cycles) on a NextSeq  
281 550 (Illumina) at 200 million reads per library.

282

### 283 **Single-cell RNA-seq data analysis.**

284

285 In our analysis we largely followed a recently published approach<sup>9</sup>. Firstly, we aligned  
286 reads to GRCh38 human reference genome with Cell Ranger 3.0 (10x Genomics)  
287 using default parameters to produce the cell-by-gene, Unique Molecular Identifier  
288 (UMI) count matrix. UMI counts were analyzed using the Seurat R package v.3. Cells  
289 were filtered for a min. 1000 & max. 6000 genes, maximal mitochondrial content of  
290 15%, and maximal ribosomal content of 30%. Resulting high quality cells were  
291 normalized ("LogNormalize") for scaled for each cell to a total expression of 10K UMI.  
292 Variable genes were identified by Seurat's FindVariableFeatures implementation  
293 ("FastLogVMR"). We found that regression for UMI count, mitochondrial or ribosomal  
294 content (via ScaleData) does not improve the separation of known cell types, therefore  
295 we did not regress out any known variables.

296

### 297 **Data integration and Batch correction.**

298

299 We integrated the 4 sequencing libraries (batches 1 & 2 for wt & TSC2) using  
300 Canonical Correlation Analysis (CCA), based on integration anchors calculated on the



301 first 30 components. Briefly, correlation vectors across datasets are aligned by  
302 "dynamic time warping" algorithm, resulting in all cells embedded in a shared low-  
303 dimensional CCA space, where batch variation is minimized. Cell-to-cell distances in  
304 aligned CCA space are the basis for later visualization (UMAP).

305

## 306 **Clustering**

307

308 For Principal Components Analysis (PCA), the data was transformed ('ScaleData') so  
309 that the mean expression of each gene across cells is 0, and that the variance is 1,  
310 ensuring equal weight to each gene, regardless of absolute expression level. Principal  
311 components were calculated on the variable genes. We then calculated the k-nearest  
312 neighbors of each cell from Euclidean distances in PCA-space (using top 30 principal  
313 components). Next, we constructed the shared nearest neighbor (SNN) graph, where  
314 each edge (between two cells) is weighted by the fraction of overlap between the two  
315 cells' k-nearest neighbors (also known as Jaccard similarity), using default  
316 parameters. Louvain clustering on this graph (resolution=0.3) identified 16 clusters.  
317 Clusters were visualized on UMAPs. UMAP is a nonlinear dimensionality reduction  
318 technique compressing cell-to-cell distances calculated in CCA space to two 2  
319 (plotting) dimensions.

320

## 321 **Cluster identity**

322

323 We calculated differentially expressed genes in each cluster (compared to the rest of  
324 the cells) using Seurat's Wilcoxon test implementation and analyzed genes with  
325 Bonferroni-adjusted P value < 0.05, along the expression of classical marker genes of  
326 known cell types. Based on this, we manually labeled each cell type (Fig.2A).

327

## 328 **Integration of Organoid and fetal single-cell data**

329

330 To confirm the identity of our cell types, we integrated our organoid data with recently  
331 published single-cell data from fetal brains of various developmental ages<sup>10</sup>. The fetal  
332 samples have been sequenced on the same platform (10X Chromium) and were  
333 obtained from <https://cells.ucsc.edu>. The fetal dataset was integrated with our  
334 organoid data the same way as described above, with the following differences: The

335 fetal datasets from different individuals showed large variation in quality, with the  
336 following fractions passing the above defined quality thresholds: week 6: 97% = 5970  
337 cells; week 10: 93% = 7193 cells; week 14: 18% = 14435 cells; week 18: 93% = 78157  
338 cells; week 22: 32% = 83619 cells. Such strongly skewed distribution of high-quality  
339 cells towards late embryos (week 18 & 22) would skew the integrated data analysis,  
340 where the variance identified would mostly be representative of late development. To  
341 achieve a more equal representation of different developmental stages, we (1) relaxed  
342 the minimum UMI filtering criteria to 800 and the maximal ribosomal content to 40%,  
343 plus (2) we down sampled datasets (post filtering) to similar numbers of cells (max  
344 10000 cells per fetal sample, and max 5000 per organoid). The integrated analysis  
345 otherwise followed the steps described above. Transcriptome-wide for figure 2D, the  
346 average gene expression of CLIP-cells from organoids is compared to fetal cells'  
347 average gene expression by Pearson correlation coefficients.

348

349

#### 350 **Analysis of whole genome sequencing data:**

351

352 Samples were processed using the nfc/sarek pipeline v2.5.1<sup>11</sup>, more specifically  
353 reads were aligned to GRCh38 using bwa mem v0.7.17, alignments were post-  
354 processed using GATK v4.1.2.0 according to GATK best practices, ascatNgs was  
355 used to perform genome-wide allele-specific copy number analysis. A circos  
356 visualization of the overall genomic variant profile was generated with hmftools (purple  
357 v2.34, cobalt v1.7, amber v3.0) using somatic variations identified by Strelka v2.9.10.

358

359

#### 360 **Mass spectrometry:**

361

#### 362 **Sample preparation**

363

364 Cell pellets for the FACS sorting were processed via iST kit 96x (PreOmics GmbH)  
365 according original protocol from manufacturer. Briefly, pellet was mixed with 50 µl of  
366 Lysis buffer and incubated 10 min in 95 °C. After cooling to room temperature lysate  
367 was mixed with 50 µl of digest solution and incubated overnight in 37 °C. In the next  
368 step solution was transferred into cartridge with 100 µl of Stop solution. After the



369 washing by solution Wash1 and Wash2 (each 200  $\mu$ l) peptides were eluted from the  
370 cartridge by Elute solution in two steps (each with 100  $\mu$ l). Peptide solution was  
371 completely dried via Speed Vac.

372 Dried peptides were solubilized in 50  $\mu$ l of 0.1 % TFA and sonicate in  
373 ultrasonication bath Sonorex RK52 (Bandelin). Peptide solution was stored in -80°C  
374 prior the nanoLC-MS/MS analysis.

375

### 376 **Stable isotope labelled (SIL) peptides synthesis**

377

378 To determine retention time of targeted peptides of TSC1 and TSC2 stable isotope  
379 labelled peptides were synthesized. N-terminal amino acid was changed for the  
380 [ $^{13}\text{C}_6, ^{15}\text{N}_2$ ]-lysine respectively for the [ $^{13}\text{C}_6, ^{15}\text{N}_4$ ]-arginine. Peptides were synthesized  
381 using solid-phase Fmoc chemistry, purified using preparative reversed-phase  
382 chromatography, lyophilized, and subsequently characterized by MALDI-TOF-MS  
383 (using an ABI 4800 MALDI-TOF/TOF, SCIEX Peptides were pooled and spiked in real  
384 samples before the injection into nanoLC-MS/MS system.

385

### 386 **NanoLC-MS/MS analysis and data processing**

387

388 The nano HPLC system used was an UltiMate 3000 RSLC nano system coupled  
389 to a Q Exactive HF-X mass spectrometer, equipped with the with an EASY-  
390 Spray™ source (Thermo Fisher Scientific) and Jailbreak 1.0 (Phoenix S&T). Peptides  
391 were loaded onto a trap column (Thermo Fisher Scientific, PepMap C18, 5 mm  $\times$  300  
392  $\mu$ m ID, 5  $\mu$ m particles, 100 Å pore size) at a flow rate of 25  $\mu$ L/min using 0.1% TFA as  
393 mobile phase. After 10 min, the trap column was switched in line with the analytical  
394 column (Thermo Fisher Scientific, PepMap C18, 500 mm  $\times$  75  $\mu$ m ID, 2  $\mu$ m, 100 Å).  
395 Peptides were eluted using a flow rate of 230 nl/min, and a binary 2h gradient,  
396 respectively 165 min.

397 The gradient starts with the mobile phases: 98% A (water/formic acid, 99.9/0.1,  
398 v/v) and 2% B (water/acetonitrile/formic acid, 19.92/80/0.08, v/v/v), increases to 35%  
399 B over the next 130 min, followed by a gradient in 5 min to 90% B, stays there for 5  
400 min and decreases in 2 min back to the gradient 98% A and 2% B for equilibration at  
401 30°C.

402 The Q Exactive HF-X mass spectrometer was operated by a mixed MS method which  
403 consisted of one full scan ( $m/z$  range 380-1,500; 15,000 resolution; target value 1e6)  
404 followed by the PRM of targeted peptides from an inclusion list (isolation window 0.7  
405  $m/z$ ; normalized collision energy (NCE) 30; 30,000 resolution, AGC target 2e5). The  
406 maximum injection time variably changed based on the number of targets in the  
407 inclusion list to use up the total cycle time of 600 ms. The scheduling window were set  
408 to 4 min for each precursor.

409 List of peptides including basic mass spectrometry information used for PRM analysis  
410 of TSC1, TSC2 and 5 normalization proteins are displayed in the table in Ext. Data  
411 Figure 13.

412 Data processing and manual evaluation of results were performed in Skyline-daily (64-  
413 bit, v19.0.9.190.<sup>12</sup>). For the data processing peptides were used which had at least 3  
414 specific peptide fragments. TSC1 and TSC2 proteins were quantified based on  
415 integrated ion intensities over retention time of peptides from inclusion list. To account  
416 for different amounts between samples, these values were normalized based on a set  
417 of five abundant/house-keeping proteins (SRP14, LMNB1, HIST1H1B, GAPDH and  
418 MDH2). Based on the abundance of these proteins, normalization factors for each  
419 normalization protein and sample were computed. The median of these factors per  
420 sample was used to normalize TSC1 and TSC2 abundance.

421

422

423

424

## 425 References

426

427 1 Agu, C. A. *et al.* Successful Generation of Human Induced Pluripotent Stem Cell Lines  
428 from Blood Samples Held at Room Temperature for up to 48 hr. *Stem Cell Reports* **5**,  
429 660-671, doi:10.1016/j.stemcr.2015.08.012 (2015).

430 2 Jinek, M. *et al.* A programmable dual-RNA-guided DNA endonuclease in adaptive  
431 bacterial immunity. *Science* **337**, 816-821, doi:10.1126/science.1225829 (2012).

432 3 Lancaster, M. A. & Knoblich, J. A. Generation of cerebral organoids from human  
433 pluripotent stem cells. *Nat Protoc* **9**, 2329-2340, doi:10.1038/nprot.2014.158 (2014).

434 4 Bardy, C. *et al.* Neuronal medium that supports basic synaptic functions and activity of  
435 human neurons in vitro. *Proc Natl Acad Sci U S A* **112**, E3312,  
436 doi:10.1073/pnas.1509741112 (2015).

437 5 Blair, J. D., Hockemeyer, D. & Bateup, H. S. Genetically engineered human cortical  
438 spheroid models of tuberous sclerosis. *Nat Med* **24**, 1568-1578, doi:10.1038/s41591-  
439 018-0139-y (2018).

- 440 6     Bian, S. *et al.* Genetically engineered cerebral organoids model brain tumor formation.  
441     *Nat Methods* **15**, 631-639, doi:10.1038/s41592-018-0070-7 (2018).
- 442 7     Lancaster, M. A. *et al.* Cerebral organoids model human brain development and  
443     microcephaly. *Nature* **501**, 373-379, doi:10.1038/nature12517 (2013).
- 444 8     Lancaster, M. A. *et al.* Guided self-organization and cortical plate formation in human  
445     brain organoids. *Nat Biotechnol* **35**, 659-666, doi:10.1038/nbt.3906 (2017).
- 446 9     Velasco, S. *et al.* Individual brain organoids reproducibly form cell diversity of the  
447     human cerebral cortex. *Nature* **570**, 523-527, doi:10.1038/s41586-019-1289-x (2019).
- 448 10    Bhaduri, A. *et al.* Cell stress in cortical organoids impairs molecular subtype  
449    specification. *Nature*, doi:10.1038/s41586-020-1962-0 (2020).
- 450 11    Garcia, M. *et al.* Sarek: A portable workflow for whole-genome sequencing analysis of  
451    germline and somatic variants. *F1000Research* **9**, doi:10.12688/f1000research.16665.1  
452    (2020).
- 453 12    MacLean, B. *et al.* Skyline: an open source document editor for creating and analyzing  
454    targeted proteomics experiments. *Bioinformatics* **26**, 966-968,  
455    doi:10.1093/bioinformatics/btq054 (2010).
- 456
